# Supplementary material for: Isoprene-Emitting Tobacco Plants Are Less Affected by Moderate Water Deficit under Future Climate Change Scenario and Show Adjustments of Stress-Related Proteins in Actual Climate
Source: MDPI journal article supplement (doi:10.3390/plants12020333), 2023-01-11
Supplement: s1 [file Supplementary Table S1.xlsx]

## Sheet: SM Table S1
SPOT	PROTEIN NAME (https://www.uniprot.org/)	NE-WT ACWW T0		NE-WT ACWS T3		NE-WT AC-WS T4		IE-H ACWW T0		IE-H ACWS T3		IE-H ACWS T4			IE-H T4/IE-H T3	IE-H T4/IE-H T0	IE-H T4/NE-WT T4	IE-H T4/NE-WT T3	IE-H T4/NE-WT T0	IE-H T3/IE-H T0	IE-H T3/NE-WT T4	IE-H T3/NE-WT T3	IE-H T3/NE-WT T0	IE-H T0/NE-WT T4	IE-H T0/NE-WT T3	IE-H T0-NE-WT T0	NE-WT T4-NE-WT T3	NE-WT T4-NE-WT T0	NE-WT T3-NE-WT T0
		average	st dev	average	st dev	average	st dev	average	st dev	average	st dev	average	st dev		p value	p value	p value	p value	p value	p value	p value	p value	p value	p value	p value	p value	p value	p value	p value
402	402_RecName: Full=Ribulose bisphosphate carboxylase/oxygenase activase 2, chloroplastic; Short=RA 2; Short=RuBisCO activase 2; Flags: Precursor [Nicotiana tabacum]	1.03311	0.178699	1.36642	0.374168	1.02338	0.426935	0.681433	0.336111	1.44533	0.149065	1.20581	0.181672		ns	ns	ns	ns	ns	ns	ns	ns	ns	ns	ns	ns	ns	ns	ns
405	405_RecName: Full=Ribulose bisphosphate carboxylase/oxygenase activase 2, chloroplastic; Short=RA 2; Short=RuBisCO activase 2; Flags: Precursor [Nicotiana tabacum]	1.13462	0.138043	1.02432	0.0457251	0.69446	0.069558	0.881723	0.191068	1.16559	0.233444	1.11268	0.222793		ns	ns	ns	ns	ns	ns	ns	ns	ns	ns	ns	ns	ns	ns	ns
423	423_PREDICTED: ATP-dependent Clp protease ATP-binding subunit clpA homolog CD4B, chloroplastic isoform X2 [Nicotiana tomentosiformis]	0.842741	0.00987145	1.13117	0.0788909	0.923497	0.220277	0.938728	0.135661	1.24967	0.0879867	1.08035	0.167237		ns	ns	ns	ns	ns	ns	ns	ns	ns	ns	ns	ns	ns	ns	ns
424	424_PREDICTED: ATP-dependent Clp protease ATP-binding subunit clpA homolog CD4B, chloroplastic isoform X2 [Nicotiana tomentosiformis]	0.799372	0.100979	1.12424	0.0519459	1.20606	0.0970215	0.833235	0.173079	1.19435	0.0829153	1.2827	0.318949		ns	ns	ns	ns	ns	ns	ns	ns	ns	ns	ns	ns	ns	ns	ns
425	425_PREDICTED: ATP-dependent Clp protease ATP-binding subunit clpA homolog CD4B, chloroplastic isoform X2 [Nicotiana tomentosiformis]	0.755791	0.153804	1.12399	0.149246	1.21925	0.146667	1.04303	0.417013	1.02994	0.18901	1.24769	0.382891		ns	ns	ns	ns	ns	ns	ns	ns	ns	ns	ns	ns	ns	ns	ns
428	428_PREDICTED: ATP-dependent Clp protease ATP-binding subunit clpA homolog CD4B, chloroplastic isoform X2 [Nicotiana tomentosiformis]	0.714729	0.07765	0.986493	0.0750823	1.14018	0.325801	1.24575	0.799738	1.02366	0.0963039	1.30404	0.333983		ns	ns	ns	ns	ns	ns	ns	ns	ns	ns	ns	ns	ns	ns	ns
429	429_PREDICTED: ATP-dependent Clp protease ATP-binding subunit clpA homolog CD4B, chloroplastic isoform X2 [Nicotiana tomentosiformis]	0.710747	0.180768	1.01849	0.0680042	1.36114	0.575919	1.05695	0.438576	0.956688	0.290158	1.2857	0.270805		ns	ns	ns	ns	ns	ns	ns	ns	ns	ns	ns	ns	ns	ns	ns
432	432_PREDICTED: heat shock protein 81-1-like [Nicotiana sylvestris]	0.90709	0.0782865	1.1812	0.296575	0.761644	0.208057	0.990472	0.141305	1.33111	0.367019	1.17001	0.258542		ns	ns	ns	ns	ns	ns	ns	ns	ns	ns	ns	ns	ns	ns	ns
433	433_PREDICTED: heat shock protein 81-1-like [Nicotiana tomentosiformis]	0.699297	0.057361	1.07228	0.130588	0.996012	0.190534	0.697891	0.217908	1.55523	0.589309	1.12661	0.215863		ns	ns	ns	ns	ns	ns	ns	ns	ns	ns	ns	ns	ns	ns	ns
434	434_RecName: Full=Ribulose bisphosphate carboxylase/oxygenase activase 2, chloroplastic; Short=RA 2; Short=RuBisCO activase 2; Flags: Precursor [Nicotiana tabacum]	0.875986	0.069015	1.15456	0.110726	0.809736	0.215544	0.720476	0.297302	1.532	0.411342	1.03527	0.156017		ns	ns	ns	ns	ns	ns	ns	ns	ns	ns	ns	ns	ns	ns	ns
443	Unknown	0.903279	0.0980668	0.918902	0.0606831	1.05631	0.077031	0.967411	0.0934603	1.0708	0.204267	1.06628	0.167671		ns	ns	ns	ns	ns	ns	ns	ns	ns	ns	ns	ns	ns	ns	ns
469	469_PREDICTED: ruBisCO large subunit-binding protein subunit alpha [Nicotiana tomentosiformis]	1.2116	0.320726	1.36063	0.21625	1.19005	0.467361	1.3198	0.657525	2.10176	0.0299197	1.2174	0.262619		ns	ns	ns	ns	ns	ns	ns	ns	ns	ns	ns	ns	ns	ns	ns
486	Unknown	0.809356	0.0716669	1.0722	0.0890371	1.07916	0.135077	0.901073	0.0938194	1.13042	0.0933843	1.16357	0.245155		ns	ns	ns	ns	ns	ns	ns	ns	ns	ns	ns	ns	ns	ns	ns
488	488_plastid transketolase [Nicotiana tabacum]	0.880875	0.308491	0.836874	0.0263571	1.06757	0.358893	0.806958	0.259922	0.707412	0.282807	1.2034	0.34461		ns	ns	ns	ns	ns	ns	ns	ns	ns	ns	ns	ns	ns	ns	ns
493	493_plastid transketolase [Nicotiana tabacum]	0.909437	0.240497	0.772859	0.149612	1.32909	0.488378	0.874208	0.400589	0.712223	0.194779	1.03987	0.371689		ns	ns	ns	ns	ns	ns	ns	ns	ns	ns	ns	ns	ns	ns	ns
499	499_rbcL gene product (chloroplast) [Nicotiana undulata]	0.689555	0.246023	0.937897	0.0535937	1.07665	0.316279	0.730093	0.143982	0.870688	0.192975	1.24994	0.345047		ns	ns	ns	ns	ns	ns	ns	ns	ns	ns	ns	ns	ns	ns	ns
510	510_PREDICTED: lysosomal alpha-mannosidase-like [Nicotiana sylvestris]	0.671553	0.137726	0.446892	0.19239	0.498906	0.304498	0.999336	0.251341	0.638432	0.0787072	0.731615	0.247778		ns	ns	ns	ns	ns	ns	ns	ns	ns	ns	ns	ns	ns	ns	ns
513	513_PREDICTED: stromal 70 kDa heat shock-related protein, chloroplastic [Nicotiana sylvestris]	0.772918	0.0440418	1.26133	0.334373	0.756522	0.165885	0.770508	0.357353	1.3797	0.303936	0.801864	0.0468826		ns	ns	ns	ns	ns	ns	ns	ns	ns	ns	ns	ns	ns	ns	ns
516	516_PREDICTED: stromal 70 kDa heat shock-related protein, chloroplastic [Nicotiana sylvestris]	0.852373	0.159184	1.26327	0.293099	0.787156	0.0620135	0.756909	0.225186	1.4806	0.321517	0.959716	0.094721		ns	ns	ns	ns	ns	ns	ns	ns	ns	ns	ns	ns	ns	ns	ns
517	517_PREDICTED: heat shock cognate 70 kDa protein 2-like [Nicotiana sylvestris]	0.728391	0.0710486	0.99146	0.0904451	0.729438	0.253409	0.870582	0.0531617	1.18451	0.188962	0.818788	0.322757		ns	ns	ns	ns	ns	ns	ns	ns	ns	ns	ns	ns	ns	ns	ns
524	524_PREDICTED: stromal 70 kDa heat shock-related protein, chloroplastic [Nicotiana sylvestris]	0.968986	0.156963	1.14073	0.0984903	0.960015	0.0343986	0.917969	0.217414	1.36005	0.515647	0.885045	0.171922		ns	ns	ns	ns	ns	ns	ns	ns	ns	ns	ns	ns	ns	ns	ns
526	526_PREDICTED: luminal-binding protein [Nicotiana sylvestris]	0.669757	0.0890875	0.895861	0.100883	0.972803	0.393583	0.865447	0.32051	1.06651	0.211692	0.888381	0.287216		ns	ns	ns	ns	ns	ns	ns	ns	ns	ns	ns	ns	ns	ns	ns
528	528_PREDICTED: stromal 70 kDa heat shock-related protein, chloroplastic [Nicotiana sylvestris]	1.06544	0.172578	0.920743	0.0612277	0.931873	0.290698	1.02091	0.412609	1.02031	0.212751	0.704871	0.198046		ns	ns	ns	ns	ns	ns	ns	ns	ns	ns	ns	ns	ns	ns	ns
529	529_PREDICTED: stromal 70 kDa heat shock-related protein, chloroplastic [Nicotiana sylvestris]	1.03056	0.15834	0.871736	0.0912363	0.872906	0.340067	1.11562	0.502622	0.851038	0.134527	0.604816	0.124906		ns	ns	ns	ns	ns	ns	ns	ns	ns	ns	ns	ns	ns	ns	ns
530	530_PREDICTED: stromal 70 kDa heat shock-related protein, chloroplastic [Nicotiana sylvestris]	0.653857	0.135281	1.03005	0.131839	0.920871	0.392008	0.868268	0.121209	1.04729	0.249349	0.749763	0.0624301		ns	ns	ns	ns	ns	ns	ns	ns	ns	ns	ns	ns	ns	ns	ns
532	Unknown	0.700349	0.0863931	0.918234	0.150304	0.781377	0.115176	0.801097	0.136891	1.07041	0.182382	0.771734	0.274703		ns	ns	ns	ns	ns	ns	ns	ns	ns	ns	ns	ns	ns	ns	ns
538	538_ribulose-1,5-biphosphate carboxylase/ oxygenase large subunit [Nicotiana tabacum]	0.941286	0.23033	1.02552	0.125035	1.05022	0.290865	0.874873	0.306301	0.891183	0.183142	1.21684	0.0925318		ns	ns	ns	ns	ns	ns	ns	ns	ns	ns	ns	ns	ns	ns	ns
548	548_ribulose 1,5-bisphosphate carboxylase/oxygenase large subunit, partial (chloroplast) [Nicotiana sylvestris]	0.817386	0.143541	1.03098	0.0463001	1.40025	0.559923	0.9081	0.119391	1.15539	0.264607	1.16534	0.18205		ns	ns	ns	ns	ns	ns	ns	ns	ns	ns	ns	ns	ns	ns	ns
561	561_PREDICTED: ATP-dependent zinc metalloprotease FTSH, chloroplastic [Nicotiana tomentosiformis]	0.931645	0.155047	1.05333	0.119119	1.28495	0.431125	0.977968	0.144534	1.17049	0.0883086	1.1152	0.101589		ns	ns	ns	ns	ns	ns	ns	ns	ns	ns	ns	ns	ns	ns	ns
579	579_PREDICTED: ATP-dependent zinc metalloprotease FTSH 2, chloroplastic [Nicotiana sylvestris]	0.78046	0.00209353	1.04757	0.161986	0.948585	0.077411	0.753855	0.02929	1.07938	0.214663	1.08947	0.193033		ns	ns	ns	ns	ns	ns	ns	ns	ns	ns	ns	ns	ns	ns	ns
581	581_PREDICTED: ATP-dependent zinc metalloprotease FTSH 2, chloroplastic [Nicotiana tomentosiformis]	0.85071	0.00677844	0.983508	0.131323	1.10692	0.272894	0.860847	0.251616	0.981143	0.0537015	1.00218	0.186024		ns	ns	ns	ns	ns	ns	ns	ns	ns	ns	ns	ns	ns	ns	ns
583	583_PREDICTED: ATP-dependent zinc metalloprotease FTSH 2, chloroplastic [Nicotiana sylvestris]	0.764603	0.0554342	0.802829	0.173224	0.921631	0.132908	0.718154	0.169461	0.674269	0.00358742	0.88972	0.145394		ns	ns	ns	ns	ns	ns	ns	ns	ns	ns	ns	ns	ns	ns	ns
584	584_PREDICTED: ATP-dependent zinc metalloprotease FTSH 2, chloroplastic [Nicotiana tomentosiformis]	0.854727	0.0823014	0.907483	0.110362	1.05547	0.207077	0.875493	0.198786	0.89159	0.0268407	0.956418	0.211963		ns	ns	ns	ns	ns	ns	ns	ns	ns	ns	ns	ns	ns	ns	ns
605	Unknown	0.797671	0.180621	1.34846	0.061315	0.903721	0.0440797	0.746728	0.431441	1.65609	0.605545	1.1475	0.13749		ns	ns	ns	ns	ns	ns	ns	ns	ns	ns	ns	ns	ns	ns	ns
608	Unknown	0.623077	0.152555	0.998522	0.210252	0.799116	0.107048	0.722308	0.174904	1.28792	0.150112	1.04314	0.0983397		ns	ns	ns	ns	ns	ns	ns	ns	ns	ns	ns	ns	ns	ns	ns
610	610_ATP synthase CF1 alpha subunit [Nicotiana sylvestris]	0.745333	0.114328	1.16976	0.304169	1.18187	0.0569176	0.872315	0.0881745	1.3046	0.195069	1.02651	0.207616		ns	ns	ns	ns	ns	ns	ns	ns	ns	ns	ns	ns	ns	ns	ns
615	615_ATP synthase CF1 alpha subunit [Nicotiana sylvestris]	0.759365	0.177069	0.947779	0.109978	1.11165	0.218896	0.913084	0.184138	0.904283	0.0211029	0.84606	0.172632		ns	ns	ns	ns	ns	ns	ns	ns	ns	ns	ns	ns	ns	ns	ns
617	617_ribulose-1,5-bisphosphate carboxylase/oxygenase large subunit [Solanum sp. SH-2010]	0.855834	0.171614	1.01908	0.22804	1.06795	0.30921	0.868713	0.138442	1.05496	0.249293	1.12937	0.366314		ns	ns	ns	ns	ns	ns	ns	ns	ns	ns	ns	ns	ns	ns	ns
618	618_ribulose-1,5-bisphosphate carboxylase/oxygenase large subunit, partial (chloroplast) [Psidium cattleyanum]	0.951121	0.261475	1.10341	0.38432	1.1956	0.486787	0.908928	0.24505	0.990821	0.176118	1.0973	0.34587		ns	ns	ns	ns	ns	ns	ns	ns	ns	ns	ns	ns	ns	ns	ns
624	Unknown	0.845338	0.141335	1.03677	0.074055	0.929954	0.163481	1.08341	0.0660277	1.08351	0.156922	0.961823	0.0663792		ns	ns	ns	ns	ns	ns	ns	ns	ns	ns	ns	ns	ns	ns	ns
629	Unknown	0.641503	0.210247	1.39465	0.5052	0.750206	0.159069	0.841764	0.286562	1.43101	0.190905	0.885455	0.0939441		ns	ns	ns	ns	ns	ns	ns	ns	ns	ns	ns	ns	ns	ns	ns
632	Unknown	0.384825	0.0712081	1.20653	0.362388	0.880139	0.468087	0.710385	0.377583	1.82401	0.490806	1.63686	0.545518		ns	ns	ns	ns	ns	ns	ns	ns	ns	ns	ns	ns	ns	ns	ns
633	mix (ATP synthase CF1 alpha subunit + stress protein DDR48-like)	0.324729	0.0944469	1.1027	0.298448	0.937162	0.664395	0.660709	0.401579	1.93782	0.403167	2.16392	1.05077		ns	*	*	*	*	*	*	*	*	ns	ns	ns	ns	ns	*
634	634_ribulose-1,5-bisphosphate carboxylase/oxygenase large subunit [Geranium vulcanicola]	0.926599	0.191963	1.02555	0.112231	1.04424	0.380832	0.914732	0.136929	1.13512	0.302822	1.11847	0.319835		ns	ns	ns	ns	ns	ns	ns	ns	ns	ns	ns	ns	ns	ns	ns
637	Unknown	0.783342	0.122546	0.948347	0.131396	0.987744	0.290359	1.07345	0.131327	1.06471	0.216457	1.06174	0.192044		ns	ns	ns	ns	ns	ns	ns	ns	ns	ns	ns	ns	ns	ns	ns
638	mix (rubisco LSU + ATP B)	0.834801	0.0842553	0.99165	0.169484	0.923823	0.249528	0.964762	0.0374302	0.991171	0.188065	1.03722	0.138198		ns	ns	ns	ns	ns	ns	ns	ns	ns	ns	ns	ns	ns	ns	ns
641	641_ribulose-1,5-bisphosphate carboxylase/oxygenase large subunit, partial (chloroplast) [Petunia x hybrida]	1.17506	0.450745	1.02995	0.363966	1.07695	0.329679	0.920915	0.187932	0.906982	0.22277	0.958968	0.162578		ns	ns	ns	ns	ns	ns	ns	ns	ns	ns	ns	ns	ns	ns	ns
646	Unknown	0.664692	0.274907	1.29135	0.145988	0.800906	0.0182524	0.983092	0.21429	1.56812	0.188996	1.0612	0.0828014		ns	ns	ns	ns	ns	ns	ns	ns	ns	ns	ns	ns	ns	ns	ns
653	RuBisCO large subunit-binding protein subunit alpha	0.554648	0.113867	1.37188	0.197322	0.81916	0.125757	0.974429	0.585379	1.93571	1.06193	1.04368	0.363995		*	ns	ns	ns	ns	*	*	ns	*	ns	ns	ns	ns	ns	*
654	RuBisCO large subunit-binding protein subunit alpha	0.606246	0.0153329	1.61669	0.498208	1.01296	0.2466	0.983404	0.616246	1.54271	0.405729	1.1293	0.449043		ns	ns	ns	ns	ns	ns	ns	ns	*	ns	*	ns	*	ns	*
657	Unknown	0.724289	0.138153	1.09877	0.198699	0.73429	0.154263	1.18446	0.281192	1.4445	0.153297	0.927352	0.0930334		ns	ns	ns	ns	ns	ns	ns	ns	ns	ns	ns	ns	ns	ns	ns
659	mix (RCA + ATP B)	0.744722	0.0501126	1.12592	0.235605	0.909443	0.138452	1.27047	0.352324	1.39976	0.0635022	0.948288	0.0566176		*	*	ns	ns	ns	ns	*	ns	*	*	ns	*	ns	ns	*
662	Unknown	1.03412	0.381372	1.12852	0.579287	8.36976	11.2096	1.26715	0.640213	0.770361	0.259448	0.955528	0.185009		ns	ns	ns	ns	ns	ns	ns	ns	ns	ns	ns	ns	ns	ns	ns
681	Unknown	0.879134	0.0830975	0.8337	0.134571	1.14116	0.258527	0.785139	0.168839	0.831634	0.0736174	0.89719	0.0536157		ns	ns	ns	ns	ns	ns	ns	ns	ns	ns	ns	ns	ns	ns	ns
696	Unknown	1.0489	0.00974055	0.881246	0.125527	1.10694	0.29084	0.93492	0.228212	0.850089	0.105868	0.944696	0.011585		ns	ns	ns	ns	ns	ns	ns	ns	ns	ns	ns	ns	ns	ns	ns
697	Unknown	1.29181	0.351338	1.0091	0.257993	1.46774	0.217574	0.887021	0.132543	0.700698	0.0846119	0.862195	0.0389734		ns	ns	ns	ns	ns	ns	ns	ns	ns	ns	ns	ns	ns	ns	ns
700	Unknown	0.601105	0.0583225	0.94282	0.1738	1.1806	0.267982	1.05433	0.159795	1.4464	0.101454	1.42156	0.460829		ns	ns	ns	ns	ns	ns	ns	ns	ns	ns	ns	ns	ns	ns	ns
717	717_ribulose 1,5-bisphosphate carboxylase/oxygenase large subunit, partial (chloroplast) [Nicotiana sylvestris]	1.14914	0.598593	0.850663	0.845568	2.63996	3.24041	0.449196	0.381724	0.145289	0.0226692	0.224202	0.121858		ns	ns	ns	ns	ns	ns	ns	ns	ns	ns	ns	ns	ns	ns	ns
719	Unknown	1.36606	0.771165	0.579344	0.135001	1.97739	1.67911	1.06139	0.667745	0.573663	0.160886	0.645238	0.170104		ns	ns	ns	ns	ns	ns	ns	ns	ns	ns	ns	ns	ns	ns	ns
720	Unknown	0.652363	0.0854838	0.883917	0.213687	0.860408	0.233982	1.26788	0.110137	1.13802	0.263794	1.26619	0.0463201		ns	ns	ns	ns	ns	ns	ns	ns	ns	ns	ns	ns	ns	ns	ns
726	726_ribulose-1,5-bisphosphate carboxylase/oxygenase large subunit [Nicotiana tomentosiformis]	0.541876	0.266476	0.438735	0.283242	2.2019	2.66091	1.23688	1.64903	0.147545	0.0624903	0.593418	0.317525		ns	ns	ns	ns	ns	ns	ns	ns	ns	ns	ns	ns	ns	ns	ns
729	Unknown	1.07275	0.462956	0.602929	0.148435	2.48042	2.62964	1.24628	1.1005	0.494681	0.179442	0.674043	0.174839		ns	ns	ns	ns	ns	ns	ns	ns	ns	ns	ns	ns	ns	ns	ns
730	Unknown	1.58752	0.811481	0.469333	0.154588	2.18945	2.23465	1.04437	0.569263	0.618044	0.298926	0.675631	0.252646		ns	ns	ns	ns	ns	ns	ns	ns	ns	ns	ns	ns	ns	ns	ns
732	ATP synthase subunit beta	0.706153	0.157116	0.942045	0.119646	1.08845	0.203572	1.33472	0.185488	1.61009	0.227191	1.2265	0.177673		*	ns	ns	*	*	*	*	*	*	*	*	*	ns	*	ns
733	Unknown	1.11779	0.2606	1.17274	0.126137	1.82079	0.830711	0.75142	0.280688	0.810919	0.0609214	1.19589	0.548074		ns	ns	ns	ns	ns	ns	ns	ns	ns	ns	ns	ns	ns	ns	ns
737	Ribulose 1,5-bisphosphate carboxylase/oxygenase large subunit, partial	0.690753	0.339579	0.862274	1.05371	5.64084	7.58576	0.39769	0.355533	0.0501855	0.0185569	0.126159	0.09103		ns	ns	*	ns	ns	ns	*	ns	ns	*	ns	ns	ns	*	ns
739	Unknown	0.569742	0.0540888	0.675895	0.124765	0.738351	0.160998	1.28171	0.207236	1.30085	0.0949681	1.19397	0.192125		ns	ns	ns	ns	ns	ns	ns	ns	ns	ns	ns	ns	ns	ns	ns
742	Unknown	0.581496	0.193402	1.14051	0.154899	1.8279	1.62741	0.68801	0.331169	1.03505	0.40519	1.59099	0.898714		ns	ns	ns	ns	ns	ns	ns	ns	ns	ns	ns	ns	ns	ns	ns
743	743_ribulose-1,5-bisphosphate carboxylase/oxygenase large subunit [Nicotiana tomentosiformis]	0.664216	0.470485	0.446098	0.376238	2.38043	2.51372	1.48629	2.20476	0.186758	0.213116	0.482918	0.391735		ns	ns	ns	ns	ns	ns	ns	ns	ns	ns	ns	ns	ns	ns	ns
744	744_ribulose 1,5-bisphosphate carboxylase/oxygenase large subunit, partial (chloroplast) [Nicotiana sylvestris]	0.983732	0.468381	1.06332	1.25616	3.63304	4.49812	0.520406	0.352699	0.202736	0.112825	0.27986	0.175397		ns	ns	ns	ns	ns	ns	ns	ns	ns	ns	ns	ns	ns	ns	ns
748	748_	0.80929	0.0443847	1.04681	0.0415234	1.16215	0.347164	0.773344	0.0703953	1.06026	0.0672911	1.01446	0.0642865		ns	ns	ns	ns	ns	ns	ns	ns	ns	ns	ns	ns	ns	ns	ns
751	mix (rubisco LSU + ATP B)	0.676604	0.162164	1.07504	0.0936984	1.79776	1.24633	0.595789	0.197559	1.16086	0.319226	1.5019	0.932149		ns	ns	ns	ns	ns	ns	ns	ns	ns	*	ns	ns	ns	*	ns
755	Unknown	0.722042	0.0988844	1.05936	0.212019	1.53512	1.09371	0.84031	0.13128	0.960333	0.202059	0.677556	0.138575		ns	ns	ns	ns	ns	ns	ns	ns	ns	ns	ns	ns	ns	ns	ns
757	757_ATP synthase beta subunit, partial (chloroplast) [Campanula arvatica]	0.865361	0.078571	1.10065	0.120768	1.95139	1.45859	0.815119	0.228809	0.899297	0.219035	1.52417	0.832317		ns	ns	ns	ns	ns	ns	ns	ns	ns	ns	ns	ns	ns	ns	ns
764	764_ATP synthase beta subunit [Nicotiana sylvestris]	0.502028	0.0587449	0.587667	0.0595038	0.644894	0.143235	1.36851	0.392105	0.977134	0.118266	1.14663	0.0864759		ns	ns	ns	ns	ns	ns	ns	ns	ns	ns	ns	ns	ns	ns	ns
767	767_atpB gene product (chloroplast) [Nicotiana undulata]	1.76916	0.0674172	1.37059	0.0669055	1.8875	0.37941	0.384899	0.0361253	0.340694	0.0660678	0.427959	0.106019		ns	ns	*	*	*	ns	*	*	*	*	*	*	*	ns	*
769	769_atpB gene product (chloroplast) [Nicotiana undulata]	0.55886	0.216365	0.60177	0.222031	0.694115	0.17004	1.16152	0.092357	0.894919	0.145246	1.07469	0.212378		ns	ns	ns	ns	ns	ns	ns	ns	ns	ns	ns	ns	ns	ns	ns
770	770_ATP synthase CF1 beta subunit [Nicotiana sylvestris]	1.10282	0.159495	1.14147	0.0696762	1.85087	0.578243	0.724848	0.187969	0.754149	0.0635593	0.825748	0.443108		ns	ns	ns	ns	ns	ns	ns	ns	ns	ns	ns	ns	ns	ns	ns
774	774_ribulose-1,5-bisphosphate carboxylase/oxygenase large subunit [Nicotiana tomentosiformis]	0.487061	0.132955	0.932413	0.210169	1.21345	0.680159	0.75104	0.237083	0.839659	0.148431	1.41146	0.464385		ns	ns	ns	ns	ns	ns	ns	ns	ns	ns	ns	ns	ns	ns	ns
778	778_ribulose 1,5-bisphosphate carboxylase/oxygenase [Phaeoceros carolinianus]	1.05634	0.467828	0.889805	0.805194	2.41027	2.65807	0.522951	0.379597	0.249705	0.0825807	0.367903	0.241233		ns	ns	ns	ns	ns	ns	ns	ns	ns	ns	ns	ns	ns	ns	ns
793	793_ribulose-1,5-biphosphate carboxylase/ oxygenase large subunit [Nicotiana tabacum]	0.637283	0.314528	0.599569	0.359794	1.83455	2.01791	0.884788	0.801426	0.271539	0.0808262	0.630625	0.348867		ns	ns	ns	ns	ns	ns	ns	ns	ns	ns	ns	ns	ns	ns	ns
794	794_ribulose-1,5-bisphosphate carboxylase/oxygenase large subunit [Solanum sp. SH-2010]	0.69526	0.356279	0.619247	0.565565	2.59791	3.04083	0.681874	0.710263	0.133019	0.01708	0.367018	0.202033		ns	ns	ns	ns	ns	ns	ns	ns	ns	ns	ns	ns	ns	ns	ns
798	798_mix (rubisco + protein TIC 62)	0.762896	0.384352	0.587493	0.298722	1.75045	1.84657	0.865601	0.783344	0.211395	0.0915166	0.652386	0.266989		ns	ns	ns	ns	ns	ns	ns	ns	ns	ns	ns	ns	ns	ns	ns
800	Unknown	0.671424	0.404109	0.570759	0.416492	1.86642	2.0563	1.07648	1.18565	0.166073	0.0312309	0.553182	0.263844		ns	ns	ns	ns	ns	ns	ns	ns	ns	ns	ns	ns	ns	ns	ns
801	Ribulose-1,5-biphosphate carboxylase/ oxygenase large subunit	0.643939	0.276376	0.783434	0.897433	3.86433	4.82033	0.400305	0.357919	0.0878705	0.0129285	0.171301	0.0925684		ns	ns	*	ns	ns	ns	*	ns	ns	*	ns	ns	*	*	ns
802	Unknown	0.895588	0.370206	1.04646	1.11441	2.55533	2.85498	0.567881	0.368015	0.23342	0.0354432	0.282242	0.145506		ns	ns	ns	ns	ns	ns	ns	ns	ns	ns	ns	ns	ns	ns	ns
803	Glutamate--glyoxylate aminotransferase 2	1.39228	0.446892	0.489867	0.210672	1.80135	1.72403	0.983965	0.452784	0.407258	0.120192	0.497453	0.0973771		ns	ns	*	ns	ns	ns	*	ns	ns	ns	ns	ns	*	ns	ns
805	805_ribulose-1,5-biphosphate carboxylase/ oxygenase large subunit [Nicotiana tabacum]	0.9997	0.468196	0.779548	0.711584	2.82191	3.46571	0.526224	0.328924	0.165841	0.0395554	0.264993	0.114541		ns	ns	ns	ns	ns	ns	ns	ns	ns	ns	ns	ns	ns	ns	ns
806	806_ribulose-1,5-bisphosphate carboxylase/oxygenase large subunit, partial (chloroplast) [Campanula parryi var. parryi]	1.42775	0.721513	0.718698	0.464922	1.72628	1.75434	0.839569	0.309902	0.385901	0.0703403	0.474977	0.163873		ns	ns	ns	ns	ns	ns	ns	ns	ns	ns	ns	ns	ns	ns	ns
813	Unknown	0.569006	0.115407	1.03826	0.0664987	1.42775	0.883326	0.923798	0.366964	0.921737	0.0745777	1.39787	0.477859		ns	ns	ns	ns	ns	ns	ns	ns	ns	ns	ns	ns	ns	ns	ns
817	817_ribulose 1,5-bisphosphate carboxylase [Thuja occidentalis]	0.772539	0.103042	1.01845	0.0360675	1.45455	0.717416	0.951247	0.201392	0.996234	0.162483	1.10061	0.351721		ns	ns	ns	ns	ns	ns	ns	ns	ns	ns	ns	ns	ns	ns	ns
822	822_PREDICTED: stress protein DDR48-like [Nicotiana sylvestris]	0.398312	0.103156	0.85595	0.173581	0.731393	0.510112	0.60214	0.0882827	1.60866	0.535743	1.63977	0.937271		ns	*	*	*	*	*	*	*	*	ns	ns	ns	ns	ns	ns
823	823_PREDICTED: stress protein DDR48-like [Nicotiana sylvestris]	0.373342	0.0625559	0.828763	0.216726	0.709286	0.510122	0.584918	0.200849	1.77152	0.248852	1.7471	0.858893		ns	*	*	*	*	*	*	*	*	ns	ns	ns	ns	ns	ns
825	825_PREDICTED: stress protein DDR48-like [Nicotiana sylvestris]	0.536055	0.0949523	1.01519	0.187172	0.844163	0.351124	0.708119	0.0615109	1.41488	0.397652	1.09736	0.203378		ns	ns	ns	ns	ns	ns	ns	ns	ns	ns	ns	ns	ns	ns	ns
828	828_chloroplast carbonic anhydrase, partial [Nicotiana benthamiana]	0.755272	0.0103085	1.19556	0.192747	1.0406	0.116091	0.748388	0.0804576	0.981319	0.029311	0.987089	0.0994088		ns	ns	ns	ns	ns	ns	ns	ns	ns	ns	ns	ns	ns	ns	ns
837	837_ribulose-1,5-bisphosphate carboxylase/oxygenase large subunit [Nicotiana tomentosiformis]	0.820422	0.247161	0.827505	0.227261	1.03145	0.257047	0.801637	0.322448	0.468202	0.0194664	0.72816	0.280578		ns	ns	ns	ns	ns	ns	ns	ns	ns	ns	ns	ns	ns	ns	ns
853	853_ATP synthase CF1 beta subunit [Geranium palmatum]	0.828722	0.0756873	1.24479	0.127657	0.914607	0.111334	0.883504	0.0393363	1.13878	0.168887	1.06561	0.147647		ns	ns	ns	ns	ns	ns	ns	ns	ns	ns	ns	ns	ns	ns	ns
854	854_PREDICTED: ATP synthase subunit beta, mitochondrial-like [Nicotiana tomentosiformis]	0.774736	0.0703668	1.06842	0.170299	0.929847	0.187186	0.839837	0.0736974	1.03416	0.138754	1.07215	0.185634		ns	ns	ns	ns	ns	ns	ns	ns	ns	ns	ns	ns	ns	ns	ns
855	Unknown	0.652484	0.0726881	1.20123	0.223361	0.950856	0.176973	0.79643	0.110872	1.24019	0.143015	1.14958	0.173846		ns	ns	ns	ns	ns	ns	ns	ns	ns	ns	ns	ns	ns	ns	ns
859	Unknown	0.77227	0.0330656	1.1491	0.236341	1.11235	0.0992229	0.860848	0.159519	1.07774	0.0703004	1.08421	0.388826		ns	ns	ns	ns	ns	ns	ns	ns	ns	ns	ns	ns	ns	ns	ns
860	Unknown	0.67891	0.11852	1.15727	0.401259	1.45302	0.413114	0.967255	0.158267	1.09475	0.177974	1.03407	0.233666		ns	ns	ns	ns	ns	ns	ns	ns	ns	ns	ns	ns	ns	ns	ns
886	886_PREDICTED: ribulose bisphosphate carboxylase/oxygenase activase 2, chloroplastic [Nicotiana tomentosiformis]	1.27785	0.210887	1.00725	0.154653	0.896137	0.0221977	1.07738	0.00374972	1.05575	0.112273	0.879264	0.090872		ns	ns	ns	ns	ns	ns	ns	ns	ns	ns	ns	ns	ns	ns	ns
893	Unknown	0.793405	0.0396496	1.0759	0.0693461	1.39801	0.173587	0.993231	0.0905978	1.15637	0.0856245	1.18152	0.183464		ns	*	*	ns	*	ns	*	ns	*	*	ns	*	*	*	*
897	Unknown	0.823848	0.102831	0.993571	0.161427	1.15903	0.249248	1.05304	0.166418	1.1191	0.0879402	1.07862	0.0892339		ns	ns	ns	ns	ns	ns	ns	ns	ns	ns	ns	ns	ns	ns	ns
908	Unknown	0.825963	0.140076	1.17202	0.080061	1.31221	0.117059	1.20194	0.386424	1.22646	0.0431468	1.20631	0.160874		ns	ns	ns	ns	ns	ns	ns	ns	ns	ns	ns	ns	ns	ns	ns
909	Unknown	0.8902	0.0552286	0.885738	0.0317433	0.875159	0.320528	0.874319	0.0497559	1.44298	0.147999	1.09589	0.220758		ns	ns	ns	ns	ns	ns	ns	ns	ns	ns	ns	ns	ns	ns	ns
918	918_PREDICTED: ribulose bisphosphate carboxylase/oxygenase activase 2, chloroplastic [Nicotiana tomentosiformis]	0.76745	0.0365611	1.11507	0.303839	0.776773	0.135289	0.969515	0.0462577	1.59809	0.440034	1.26631	0.346737		ns	ns	ns	ns	ns	ns	ns	ns	ns	ns	ns	ns	ns	ns	ns
920	920_PREDICTED: ribulose bisphosphate carboxylase/oxygenase activase 2, chloroplastic [Nicotiana tomentosiformis]	0.882846	0.147098	1.07521	0.148087	1.15352	0.13842	0.870996	0.36634	1.03775	0.139442	1.08238	0.314853		ns	ns	ns	ns	ns	ns	ns	ns	ns	ns	ns	ns	ns	ns	ns
921	921_PREDICTED: ribulose bisphosphate carboxylase/oxygenase activase 2, chloroplastic [Nicotiana tomentosiformis]	0.734707	0.0676954	1.0542	0.248	1.02353	0.241528	0.964528	0.114804	1.24869	0.138761	1.05195	0.132636		ns	ns	ns	ns	ns	ns	ns	ns	ns	ns	ns	ns	ns	ns	ns
924	Unknown	1.0541	0.311276	0.700263	0.113087	1.02584	0.460804	0.990464	0.0682035	0.754956	0.160221	0.875345	0.0386715		ns	ns	ns	ns	ns	ns	ns	ns	ns	ns	ns	ns	ns	ns	ns
925	925_PREDICTED: ribulose bisphosphate carboxylase/oxygenase activase 2, chloroplastic [Nicotiana tomentosiformis]	0.823799	0.13924	1.10765	0.171017	1.04176	0.0833916	0.932571	0.12267	1.07757	0.149033	1.00378	0.0974059		ns	ns	ns	ns	ns	ns	ns	ns	ns	ns	ns	ns	ns	ns	ns
926	926_PREDICTED: ribulose bisphosphate carboxylase/oxygenase activase 2, chloroplastic [Nicotiana tomentosiformis]	0.718188	0.0795937	1.18613	0.0873532	1.1272	0.43724	1.09054	0.175434	1.35777	0.195567	1.1492	0.160579		ns	ns	ns	ns	ns	ns	ns	ns	ns	ns	ns	ns	ns	ns	ns
930	930_PREDICTED: serine--glyoxylate aminotransferase [Nicotiana tomentosiformis]	1.33825	0.478618	0.57996	0.124902	0.995072	0.472279	0.955221	0.119423	0.482056	0.0508716	0.627688	0.125067		ns	ns	ns	ns	ns	ns	ns	ns	ns	ns	ns	ns	ns	ns	ns
933	Serine--glyoxylate aminotransferase-like	1.85399	0.841601	0.51562	0.140032	1.26122	1.09112	0.833312	0.260563	0.280207	0.0196242	0.421486	0.170192		ns	ns	ns	ns	*	ns	*	ns	*	ns	ns	*	ns	ns	*
935	935_PREDICTED: serine--glyoxylate aminotransferase [Nicotiana tomentosiformis]	1.93974	0.808652	0.384889	0.0491696	1.1935	1.21874	0.876601	0.258262	0.269538	0.0462901	0.325063	0.131235		ns	ns	ns	ns	*	ns	ns	ns	*	ns	ns	*	ns	ns	*
938	Unknown	0.709852	0.206016	1.14771	0.212574	1.95337	1.06833	1.37968	0.277063	1.886	1.11876	1.8468	0.356957		ns	ns	ns	ns	ns	ns	ns	ns	ns	ns	ns	ns	ns	ns	ns
943	Unknown	0.631239	0.245345	1.24375	0.0701122	2.27843	1.28386	0.885991	0.399708	1.24355	0.274362	1.44086	0.403296		ns	ns	ns	ns	ns	ns	ns	ns	ns	ns	ns	ns	ns	ns	ns
948	Unknown	0.728194	0.126826	1.18145	0.0930644	2.545	1.98054	1.14805	0.402415	1.29845	0.105963	1.28618	0.229494		ns	ns	ns	ns	ns	ns	ns	ns	ns	ns	ns	ns	ns	ns	ns
949	949_PREDICTED: phosphoglycerate kinase, chloroplastic [Nicotiana tomentosiformis]	0.726598	0.175868	1.24595	0.188782	2.40517	1.2048	1.38767	0.787775	1.66281	0.182467	1.54404	0.171609		ns	ns	ns	ns	ns	ns	ns	ns	ns	ns	ns	ns	ns	ns	ns
951	951_RecName: Full=Ribulose bisphosphate carboxylase/oxygenase activase 2, chloroplastic; Short=RA 2; Short=RuBisCO activase 2; Flags: Precursor [Nicotiana tabacum]	0.737426	0.0978116	1.14358	0.31909	2.10448	1.4438	0.898838	0.29321	1.20292	0.382488	1.37647	0.404588		ns	ns	ns	ns	ns	ns	ns	ns	ns	ns	ns	ns	ns	ns	ns
952	952_PREDICTED: ribulose bisphosphate carboxylase/oxygenase activase 2, chloroplastic [Nicotiana tomentosiformis]	0.915245	0.268841	1.12244	0.155367	1.37317	0.407691	0.861587	0.0491263	1.44784	0.1413	1.29682	0.206993		ns	ns	ns	ns	ns	ns	ns	ns	ns	ns	ns	ns	ns	ns	ns
953	953_PREDICTED: ribulose bisphosphate carboxylase/oxygenase activase 1, chloroplastic isoform X2 [Nicotiana sylvestris]	0.70262	0.108235	1.08649	0.194606	2.27022	1.5601	0.935481	0.383145	1.1245	0.24529	1.27458	0.34978		ns	ns	ns	ns	ns	ns	ns	ns	ns	ns	ns	ns	ns	ns	ns
954	954_RecName: Full=Phosphoglycerate kinase, chloroplastic; Flags: Precursor [Nicotiana tabacum]	0.656133	0.0328385	1.16743	0.167484	1.92841	1.01444	1.2763	0.759984	1.37121	0.209652	1.29398	0.226146		ns	ns	ns	ns	ns	ns	ns	ns	ns	ns	ns	ns	ns	ns	ns
957	mix (elongation factor TuB+phosphoglycerate kinase)	0.81039	0.182734	1.02435	0.217638	2.02126	1.18524	0.974144	0.238173	1.06335	0.286053	1.19017	0.341803		ns	ns	*	ns	ns	ns	*	ns	ns	*	ns	ns	*	*	ns
959	959_chloroplast elongation factor TuB (EF-TuB) [Nicotiana sylvestris]	0.609451	0.104103	0.957191	0.0550555	1.96612	1.20662	1.04054	0.49556	0.926348	0.152217	1.29258	0.277989		ns	ns	ns	ns	ns	ns	ns	ns	ns	ns	ns	ns	ns	ns	ns
960	960_PREDICTED: ribulose bisphosphate carboxylase/oxygenase activase 2, chloroplastic [Nicotiana tomentosiformis]	0.764719	0.0854932	1.11189	0.211923	1.27813	0.201736	0.889682	0.201593	1.12064	0.156244	1.28551	0.325938		ns	ns	ns	ns	ns	ns	ns	ns	ns	ns	ns	ns	ns	ns	ns
961	Unknown	0.655837	0.194498	0.999646	0.177053	1.87289	1.09669	0.815377	0.183059	1.11977	0.16815	1.41211	0.453823		ns	ns	ns	ns	ns	ns	ns	ns	ns	ns	ns	ns	ns	ns	ns
962	Unknown	0.582851	0.131755	0.921013	0.0013787	1.72337	0.869061	1.24441	0.693519	0.852792	0.174158	1.21961	0.313224		ns	ns	ns	ns	ns	ns	ns	ns	ns	ns	ns	ns	ns	ns	ns
965	Unknown	0.62501	0.162137	1.02492	0.134992	1.94524	1.21035	0.95557	0.417899	1.06333	0.194928	1.21456	0.322937		ns	ns	ns	ns	ns	ns	ns	ns	ns	ns	ns	ns	ns	ns	ns
966	966_PREDICTED: phosphoglycerate kinase, chloroplastic [Nicotiana tomentosiformis]	0.688049	0.176022	1.04361	0.0707027	2.85071	1.94394	1.22346	0.886193	1.42832	0.169265	1.51113	0.247837		ns	ns	ns	ns	ns	ns	ns	ns	ns	ns	ns	ns	ns	ns	ns
967	mix (elongation factor TuB+phosphoglycerate kinase)	0.598809	0.12467	0.991656	0.212641	2.51239	1.80379	1.01992	0.619313	0.969298	0.203276	1.32192	0.430934		ns	ns	*	ns	ns	ns	*	ns	ns	*	ns	ns	*	*	ns
968	968_PREDICTED: ribulose bisphosphate carboxylase/oxygenase activase 2, chloroplastic [Nicotiana tomentosiformis]	0.765637	0.0538476	1.28655	0.102715	1.61599	0.603674	1.07436	0.217308	1.53462	0.639716	1.70162	0.586035		ns	*	ns	ns	*	ns	ns	ns	*	ns	ns	ns	ns	*	ns
969	969_PREDICTED: phosphoglycerate kinase, chloroplastic [Nicotiana tomentosiformis]	0.555894	0.0902951	0.914605	0.0472472	2.10813	0.955466	1.17136	0.719484	0.875165	0.28004	1.1952	0.209667		ns	ns	*	ns	*	ns	*	ns	ns	*	ns	*	*	*	ns
970	970_RecName: Full=Ribulose bisphosphate carboxylase/oxygenase activase 2, chloroplastic; Short=RA 2; Short=RuBisCO activase 2; Flags: Precursor [Nicotiana tabacum]	0.624472	0.112563	1.48561	0.046911	2.22742	0.670598	1.08985	0.606869	1.16112	0.254124	1.39764	0.251633		ns	ns	*	ns	*	ns	*	ns	*	*	ns	ns	*	*	*
971	Unknown	0.693041	0.156582	1.02165	0.272233	1.89754	1.04788	1.06835	0.591002	0.907506	0.345631	1.24502	0.287203		ns	ns	ns	ns	ns	ns	ns	ns	ns	ns	ns	ns	ns	ns	ns
978	Unknown	0.796968	0.0757358	1.01998	0.044879	1.68393	0.844021	1.04183	0.0941249	0.99288	0.0759087	1.18664	0.136545		ns	ns	ns	ns	ns	ns	ns	ns	ns	ns	ns	ns	ns	ns	ns
984	Unknown	1.02269	0.118384	0.759881	0.0840696	1.16196	0.5653	0.891036	0.327477	0.725645	0.143133	0.874925	0.090601		ns	ns	ns	ns	ns	ns	ns	ns	ns	ns	ns	ns	ns	ns	ns
986	986_PREDICTED: glycerate dehydrogenase [Nicotiana sylvestris]	1.29714	0.386727	0.543859	0.159114	1.11485	0.972636	0.985692	0.416294	0.487414	0.042217	0.59556	0.046237		ns	ns	ns	ns	ns	ns	ns	ns	ns	ns	ns	ns	ns	ns	ns
989		0.780049	0.112881	0.958277	0.107478	0.999208	0.217975	1.12517	0.342926	0.943701	0.0506648	0.926933	0.0963374		ns	ns	ns	ns	ns	ns	ns	ns	ns	ns	ns	ns	ns	ns	ns
992		1.2826	0.366771	0.528502	0.119916	1.07022	0.897451	1.15278	0.260033	0.629916	0.0571998	0.678801	0.0470524		ns	ns	ns	ns	ns	ns	ns	ns	ns	ns	ns	ns	ns	ns	ns
995	995_RecName: Full=Phosphoglycerate kinase, chloroplastic; Flags: Precursor [Nicotiana tabacum]	0.675942	0.225417	1.09315	0.345505	2.43839	0.722873	1.04879	0.661527	1.51781	0.531763	1.54729	0.189134		ns	ns	*	ns	*	ns	*	ns	*	*	ns	ns	*	*	ns
1001	Unknown	0.678825	0.19288	1.03082	0.372507	2.16908	0.986041	1.32518	0.850189	1.00655	0.317472	1.27354	0.398743		ns	ns	ns	ns	ns	ns	ns	ns	ns	ns	ns	ns	ns	ns	ns
1002	Unknown	0.773128	0.0431579	1.12208	0.293412	1.7112	0.657574	1.12066	0.421265	1.12686	0.0936755	1.28255	0.238802		ns	ns	ns	ns	ns	ns	ns	ns	ns	ns	ns	ns	ns	ns	ns
1003	Unknown	0.608114	0.182939	1.10666	0.710436	2.546	1.50055	1.23451	0.970982	1.28384	0.525744	1.54636	0.559684		ns	ns	ns	ns	ns	ns	ns	ns	ns	ns	ns	ns	ns	ns	ns
1004	1004_PREDICTED: phosphoglycerate kinase, chloroplastic [Nicotiana tomentosiformis]	0.574764	0.104664	0.906713	0.122364	1.34495	0.340318	1.0215	0.34386	1.07377	0.227854	1.23799	0.117751		ns	ns	ns	ns	ns	ns	ns	ns	ns	ns	ns	ns	ns	ns	ns
1006	1006_RecName: Full=Phosphoglycerate kinase, chloroplastic; Flags: Precursor [Nicotiana tabacum]	0.572124	0.207806	0.978206	0.5311	2.44041	1.28505	1.13449	0.922733	1.27052	0.324044	1.51584	0.36615		ns	ns	ns	ns	ns	ns	ns	ns	ns	ns	ns	ns	ns	ns	ns
1008	1008_PREDICTED: phosphoglycerate kinase, chloroplastic [Nicotiana tomentosiformis]	0.472887	0.0822124	0.983546	0.397309	2.46946	1.22612	1.13718	0.97377	1.15342	0.218479	1.43402	0.180541		ns	ns	ns	ns	ns	ns	ns	ns	ns	ns	ns	ns	ns	ns	ns
1009	1009_PREDICTED: phosphoglycerate kinase, chloroplastic [Nicotiana tomentosiformis]	0.645931	0.0467958	0.97303	0.259166	1.26857	0.447918	1.05846	0.301543	1.25948	0.305775	1.44729	0.192715		ns	ns	ns	ns	ns	ns	ns	ns	ns	ns	ns	ns	ns	ns	ns
1012	1012_PREDICTED: phosphoglycerate kinase, chloroplastic [Nicotiana tomentosiformis]	0.564793	0.101649	1.08598	0.473245	2.19028	0.599408	1.0568	0.646983	1.11076	0.195695	1.53714	0.190558		ns	ns	*	ns	*	ns	*	ns	ns	*	ns	ns	*	*	ns
1013	Unknown	0.755207	0.174051	1.12826	0.137445	1.06452	0.258233	0.892521	0.236441	1.11178	0.126729	1.01919	0.167597		ns	ns	ns	ns	ns	ns	ns	ns	ns	ns	ns	ns	ns	ns	ns
1016	1016_PREDICTED: ribulose bisphosphate carboxylase/oxygenase activase 2, chloroplastic [Nicotiana tomentosiformis]	0.761065	0.294032	1.04618	0.591551	3.13362	2.01494	0.833008	0.498078	1.17015	0.736147	1.64	0.578549		ns	ns	ns	ns	ns	ns	ns	ns	ns	ns	ns	ns	ns	ns	ns
1017	1017_RecName: Full=Ribulose bisphosphate carboxylase/oxygenase activase 2, chloroplastic; Short=RA 2; Short=RuBisCO activase 2; Flags: Precursor [Nicotiana tabacum]	0.826527	0.343808	0.865751	0.775045	3.33804	2.61752	1.03685	0.853666	0.881014	0.570665	1.39434	0.535813		ns	ns	*	ns	ns	ns	*	ns	ns	*	ns	ns	*	*	ns
1018	1018_RecName: Full=Ribulose bisphosphate carboxylase/oxygenase activase 2, chloroplastic; Short=RA 2; Short=RuBisCO activase 2; Flags: Precursor [Nicotiana tabacum]	0.568159	0.26235	1.10714	0.513489	2.61399	1.04222	1.23908	1.20397	1.21073	0.433325	1.33912	0.342929		ns	ns	*	ns	ns	ns	*	ns	ns	*	ns	ns	*	*	ns
1019	1019_PREDICTED: phosphoglycerate kinase, cytosolic [Nicotiana tomentosiformis]	0.705198	0.147725	1.07327	0.383053	1.66874	0.44834	1.16416	0.505073	1.28068	0.0722886	1.35074	0.304095		ns	ns	ns	ns	ns	ns	ns	ns	ns	ns	ns	ns	ns	ns	ns
1021	1021_RecName: Full=Ribulose bisphosphate carboxylase/oxygenase activase 2, chloroplastic; Short=RA 2; Short=RuBisCO activase 2; Flags: Precursor [Nicotiana tabacum]	0.851442	0.389771	0.906658	0.721295	3.19178	1.91407	1.00761	0.775868	1.1009	0.672527	1.43091	0.567066		ns	ns	*	ns	ns	ns	*	ns	ns	*	ns	ns	*	*	ns
1022	1022_PREDICTED: phosphoglycerate kinase, cytosolic [Nicotiana tomentosiformis]	0.674876	0.112056	1.10353	0.416842	1.11853	0.0307982	1.04665	0.238836	1.38936	0.0324535	1.39338	0.199504		ns	ns	ns	ns	ns	ns	ns	ns	ns	ns	ns	ns	ns	ns	ns
1023	1023_PREDICTED: ribulose bisphosphate carboxylase/oxygenase activase 2, chloroplastic [Nicotiana tomentosiformis]	0.826437	0.456004	0.849012	0.523606	2.69638	1.8121	0.948122	0.523979	0.868214	0.514668	1.2251	0.52675		ns	ns	*	ns	ns	ns	*	ns	ns	*	ns	ns	*	*	ns
1024	Unknown	1.3583	0.100443	0.781621	0.166269	0.926948	0.265217	0.968471	0.309233	0.49799	0.0504532	0.641543	0.155236		ns	ns	ns	ns	ns	ns	ns	ns	ns	ns	ns	ns	ns	ns	ns
1027	1027_PREDICTED: ribulose bisphosphate carboxylase/oxygenase activase 2, chloroplastic [Nicotiana tomentosiformis]	0.649644	0.335485	1.09084	0.159096	2.08598	0.964195	1.07185	0.857797	1.10316	0.510613	1.2882	0.452445		ns	ns	ns	ns	ns	ns	ns	ns	ns	ns	ns	ns	ns	ns	ns
1028	mix (chloroplast ribulose bisphosphate carboxylase/oxygenase activase large isoform a + Phosphoribulokinase)	0.643902	0.0966877	0.980384	0.08787	2.04599	0.843483	1.00966	0.581018	0.962093	0.294552	1.09554	0.215182		ns	ns	*	ns	ns	ns	*	ns	ns	*	ns	ns	*	*	ns
1031	1031_PREDICTED: peroxisomal (S)-2-hydroxy-acid oxidase-like [Nicotiana tomentosiformis]	1.84811	0.320005	0.834292	0.123624	0.989127	0.221338	1.49651	1.16491	0.559371	0.103027	0.516218	0.251683		ns	ns	ns	ns	ns	ns	ns	ns	ns	ns	ns	ns	ns	ns	ns
1040	1040_PREDICTED: peroxisomal (S)-2-hydroxy-acid oxidase-like [Nicotiana tomentosiformis]	1.19924	0.294148	0.983665	0.238358	1.09725	0.413236	1.25115	0.212582	1.12611	0.201231	0.861674	0.11551		ns	ns	ns	ns	ns	ns	ns	ns	ns	ns	ns	ns	ns	ns	ns
1041	1041_PREDICTED: peroxisomal (S)-2-hydroxy-acid oxidase-like [Nicotiana tomentosiformis]	0.867248	0.254531	0.969721	0.311875	0.968488	0.669727	1.0097	0.139535	1.36684	0.397735	1.05959	0.0984901		ns	ns	ns	ns	ns	ns	ns	ns	ns	ns	ns	ns	ns	ns	ns
1051	1051_PREDICTED: peroxisomal (S)-2-hydroxy-acid oxidase-like [Nicotiana tomentosiformis]	1.35003	0.286619	0.762703	0.0765512	1.05939	0.170258	1.13259	0.388674	0.841381	0.18874	0.662391	0.248036		ns	ns	ns	ns	ns	ns	ns	ns	ns	ns	ns	ns	ns	ns	ns
1052	1052_PREDICTED: peroxisomal (S)-2-hydroxy-acid oxidase [Nicotiana tomentosiformis]	1.06083	0.107814	0.918759	0.139897	1.03361	0.293217	1.11654	0.318716	0.92371	0.277985	0.795903	0.14782		ns	ns	ns	ns	ns	ns	ns	ns	ns	ns	ns	ns	ns	ns	ns
1053	1053_PREDICTED: peroxisomal (S)-2-hydroxy-acid oxidase-like [Nicotiana tomentosiformis]	0.92428	0.221154	1.31693	0.518276	1.15632	0.829138	1.00215	0.266618	1.5557	0.444815	1.05608	0.404015		ns	ns	ns	ns	ns	ns	ns	ns	ns	ns	ns	ns	ns	ns	ns
1054	Unknown	0.689738	0.14701	0.969498	0.0449397	1.2449	0.176921	0.900024	0.473815	1.07298	0.635155	1.30691	0.608351		ns	ns	ns	ns	ns	ns	ns	ns	ns	ns	ns	ns	ns	ns	ns
1057	1057_PREDICTED: peroxisomal (S)-2-hydroxy-acid oxidase-like [Nicotiana tomentosiformis]	1.01871	0.283772	1.15892	0.48308	1.04109	0.425148	1.10997	0.381545	1.15797	0.258309	0.858251	0.173895		ns	ns	ns	ns	ns	ns	ns	ns	ns	ns	ns	ns	ns	ns	ns
1060	1060_RecName: Full=Glyceraldehyde-3-phosphate dehydrogenase, cytosolic, partial [Nicotiana tabacum]	1.1607	0.159008	1.04143	0.0709939	1.09246	0.29295	1.04525	0.315141	0.801411	0.265377	0.834975	0.156331		ns	ns	ns	ns	ns	ns	ns	ns	ns	ns	ns	ns	ns	ns	ns
1063	1063_PREDICTED: peroxisomal (S)-2-hydroxy-acid oxidase-like [Nicotiana tomentosiformis]	0.872415	0.104787	1.04991	0.161644	1.35507	0.707125	1.09173	0.186728	0.980254	0.183716	1.09742	0.0927973		ns	ns	ns	ns	ns	ns	ns	ns	ns	ns	ns	ns	ns	ns	ns
1064	Unknown	0.70499	0.212112	1.08087	0.32497	0.693653	0.0828286	0.776067	0.20539	0.970581	0.0816084	0.867227	0.212163		ns	ns	ns	ns	ns	ns	ns	ns	ns	ns	ns	ns	ns	ns	ns
1067	1067_PREDICTED: peptidyl-prolyl cis-trans isomerase CYP38, chloroplastic [Nicotiana tomentosiformis]	0.830742	0.0655942	0.899175	0.15406	0.721301	0.246228	0.873624	0.360319	0.921254	0.0697704	0.775264	0.136953		ns	ns	ns	ns	ns	ns	ns	ns	ns	ns	ns	ns	ns	ns	ns
1071	1071_PREDICTED: peptidyl-prolyl cis-trans isomerase CYP38, chloroplastic [Nicotiana sylvestris]	0.810387	0.12768	0.912935	0.15886	0.805194	0.160981	0.895704	0.314317	0.973998	0.0803255	0.882712	0.135236		ns	ns	ns	ns	ns	ns	ns	ns	ns	ns	ns	ns	ns	ns	ns
1072	Unknown	0.764851	0.112358	1.04267	0.169117	0.953027	0.140235	0.905863	0.163021	0.965413	0.136621	0.899939	0.187117		ns	ns	ns	ns	ns	ns	ns	ns	ns	ns	ns	ns	ns	ns	ns
1073	1073_PREDICTED: sedoheptulose-1,7-bisphosphatase, chloroplastic-like [Nicotiana tomentosiformis]	0.657542	0.213582	1.07286	0.280637	1.05381	0.199026	0.704489	0.142461	0.962756	0.179279	0.978653	0.24997		ns	ns	ns	ns	*	ns	ns	ns	*	*	*	ns	ns	*	*
1076	1076_PREDICTED: peroxisomal (S)-2-hydroxy-acid oxidase-like [Nicotiana tomentosiformis]	0.75693	0.242357	0.981023	0.0251086	2.18766	2.20072	1.71527	1.22649	0.725755	0.0869485	1.03566	0.250881		ns	ns	ns	ns	ns	ns	ns	ns	ns	ns	ns	ns	ns	ns	ns
1081	Unknown	0.605827	0.208585	1.09276	0.180849	1.29916	0.292472	0.755435	0.360861	0.830292	0.0683333	0.986	0.332119		ns	ns	ns	ns	ns	ns	ns	ns	ns	ns	ns	ns	ns	ns	ns
1085	Unknown	0.593695	0.151635	1.03973	0.0863695	1.51029	0.63295	0.78511	0.637569	0.789974	0.251305	1.15776	0.446128		ns	ns	ns	ns	ns	ns	ns	ns	ns	ns	ns	ns	ns	ns	ns
1089	1089_PREDICTED: glyceraldehyde-3-phosphate dehydrogenase, cytosolic [Nicotiana tomentosiformis]	0.752639	0.191439	0.805048	0.152803	3.23421	4.05399	1.71553	1.41287	0.774906	0.15717	0.892327	0.0903092		ns	ns	ns	ns	ns	ns	ns	ns	ns	ns	ns	ns	ns	ns	ns
1090	1090_PREDICTED: glyceraldehyde-3-phosphate dehydrogenase, cytosolic [Nicotiana tomentosiformis]	0.713529	0.0734327	1.04933	0.386828	1.36587	0.167232	1.36313	0.665653	1.20713	0.325048	1.17851	0.238305		ns	ns	ns	ns	ns	ns	ns	ns	ns	ns	ns	ns	ns	ns	ns
1093	1093_PREDICTED: glyceraldehyde-3-phosphate dehydrogenase, cytosolic [Nicotiana tomentosiformis]	0.637208	0.0913078	1.24729	0.317744	1.35604	0.691876	1.67819	0.639353	1.30079	0.214707	1.26792	0.186449		ns	ns	ns	ns	ns	ns	ns	ns	ns	ns	ns	ns	ns	ns	ns
1095	1095_RecName: Full=Ribulose bisphosphate carboxylase/oxygenase activase 2, chloroplastic; Short=RA 2; Short=RuBisCO activase 2; Flags: Precursor [Nicotiana tabacum]	0.787052	0.138993	0.986548	0.155329	1.06776	0.194008	0.997533	0.240657	0.974823	0.110789	1.00078	0.168829		ns	ns	ns	ns	ns	ns	ns	ns	ns	ns	ns	ns	ns	ns	ns
1096	1096_PREDICTED: glyceraldehyde-3-phosphate dehydrogenase, cytosolic [Nicotiana tomentosiformis]	0.564686	0.168167	0.987399	0.217913	1.77892	1.52907	1.4591	0.666938	1.50187	0.312088	1.19811	0.141478		ns	ns	ns	ns	ns	ns	ns	ns	ns	ns	ns	ns	ns	ns	ns
1098	1098_PREDICTED: glyceraldehyde-3-phosphate dehydrogenase, cytosolic [Nicotiana tomentosiformis]	0.839816	0.324799	0.937632	0.0868174	1.27247	0.614325	1.17286	0.14747	0.754812	0.0439858	0.927116	0.155137		ns	ns	ns	ns	ns	ns	ns	ns	ns	ns	ns	ns	ns	ns	ns
1102	1102_PREDICTED: glyceraldehyde-3-phosphate dehydrogenase, cytosolic [Nicotiana tomentosiformis]	0.829499	0.258304	1.06329	0.426508	2.4431	2.56951	1.74748	0.533587	0.925745	0.0414447	1.13902	0.330319		ns	ns	ns	ns	ns	ns	ns	ns	ns	ns	ns	ns	ns	ns	ns
1106	1106_PREDICTED: glyceraldehyde-3-phosphate dehydrogenase, cytosolic [Nicotiana tomentosiformis]	0.935466	0.390442	0.963958	0.207743	1.88018	1.75492	1.71061	0.872185	0.772739	0.173683	1.06566	0.146447		ns	ns	ns	ns	ns	ns	ns	ns	ns	ns	ns	ns	ns	ns	ns
1107	1107_PREDICTED: glyceraldehyde-3-phosphate dehydrogenase, cytosolic [Nicotiana tomentosiformis]	0.868103	0.290877	0.811438	0.148897	1.94686	1.92478	1.91074	0.830046	0.794544	0.0407552	1.12823	0.178116		ns	ns	ns	ns	ns	ns	ns	ns	ns	ns	ns	ns	ns	ns	ns
1111	Unknown	0.791649	0.0779331	1.20868	0.271841	1.5975	0.954835	0.84662	0.128202	0.810861	0.1471	1.25137	0.38768		ns	ns	ns	ns	ns	ns	ns	ns	ns	ns	ns	ns	ns	ns	ns
1114	Unknown	0.792593	0.337218	0.843772	0.163788	1.53789	1.16543	1.93122	1.53514	0.761991	0.250295	1.00247	0.3085		ns	ns	ns	ns	ns	ns	ns	ns	ns	ns	ns	ns	ns	ns	ns
1118	1118_RecName: Full=Ribulose bisphosphate carboxylase/oxygenase activase 2, chloroplastic; Short=RA 2; Short=RuBisCO activase 2; Flags: Precursor [Nicotiana tabacum]	0.819278	0.275713	1.18117	0.723527	1.15355	1.11466	0.725338	0.295716	0.30402	0.0172313	0.449092	0.304598		ns	ns	ns	ns	ns	ns	ns	ns	ns	ns	ns	ns	ns	ns	ns
1123	Unknown	0.827367	0.0113627	1.10649	0.277584	0.811895	0.133683	1.00111	0.262351	1.02903	0.177381	0.885677	0.0396968		ns	ns	ns	ns	ns	ns	ns	ns	ns	ns	ns	ns	ns	ns	ns
1124	1124_putative rubisco activase [Vigna unguiculata]	0.992121	0.274845	1.24128	0.209453	1.69912	0.67087	1.10416	0.0748071	0.95775	0.313601	1.1433	0.170089		ns	ns	ns	ns	ns	ns	ns	ns	ns	ns	ns	ns	ns	ns	ns
1125	1125_PREDICTED: 2-methylene-furan-3-one reductase [Nicotiana tomentosiformis]	1.05838	0.112368	1.10616	0.114055	1.34894	0.474237	1.01898	0.333949	1.08099	0.314002	1.04907	0.112062		ns	ns	ns	ns	ns	ns	ns	ns	ns	ns	ns	ns	ns	ns	ns
1127	Sedoheptulose-1,7-bisphosphatase	0.823554	0.0660785	1.1537	0.23918	0.623319	0.221168	0.770774	0.170034	0.962047	0.164149	0.767496	0.0307097		ns	ns	ns	*	ns	ns	*	ns	ns	ns	*	ns	*	ns	*
1129	Unknown	1.34662	0.307768	0.736629	0.199538	1.45508	1.26096	1.43365	0.647874	0.533292	0.0718123	0.469818	0.0286068		ns	ns	ns	ns	ns	ns	ns	ns	ns	ns	ns	ns	ns	ns	ns
1130	mix (chilling-responsive protein + Ribulose bisphosphate carboxylase/oxygenase activase B)	0.771151	0.176602	1.19572	0.225738	0.735957	0.0950758	0.832074	0.0710031	1.16045	0.335303	0.988408	0.0697685		ns	ns	ns	ns	ns	*	*	ns	*	ns	*	ns	*	ns	*
1131	1125_PREDICTED: 2-methylene-furan-3-one reductase [Nicotiana tomentosiformis]	0.792548	0.0348652	1.08197	0.123411	0.888396	0.0466715	0.757621	0.213217	0.914162	0.0314873	1.05186	0.234083		ns	ns	ns	ns	ns	ns	ns	ns	ns	ns	ns	ns	ns	ns	ns
1133	1133_PREDICTED: photosystem II stability/assembly factor HCF136, chloroplastic [Nicotiana sylvestris]	0.894543	0.169993	1.26082	0.298606	1.28975	0.292546	1.35888	0.469402	1.07858	0.199627	1.08187	0.27988		ns	ns	ns	ns	ns	ns	ns	ns	ns	ns	ns	ns	ns	ns	ns
1135	1135_PREDICTED: malate dehydrogenase 2, mitochondrial [Nicotiana tomentosiformis]	0.981485	0.0520979	0.882338	0.177703	0.931584	0.103419	1.04013	0.308949	0.782814	0.101593	0.895617	0.138573		ns	ns	ns	ns	ns	ns	ns	ns	ns	ns	ns	ns	ns	ns	ns
1136	1136_plastidic aldolase [Nicotiana tabacum]	0.730935	0.0992708	0.853229	0.0946354	0.656113	0.197716	0.779794	0.150085	0.634247	0.139017	0.857992	0.107557		ns	ns	ns	ns	ns	ns	ns	ns	ns	ns	ns	ns	ns	ns	ns
1137	1137_PREDICTED: malate dehydrogenase 2, mitochondrial [Nicotiana tomentosiformis]	1.14657	0.154743	0.689788	0.159782	0.893806	0.585593	1.36757	0.580603	0.7905	0.635273	0.745957	0.495224		ns	ns	ns	ns	ns	ns	ns	ns	ns	ns	ns	ns	ns	ns	ns
1141	1141_PREDICTED: chloroplast stem-loop binding protein of 41 kDa a, chloroplastic [Nicotiana sylvestris]	1.31792	0.259799	0.671453	0.110016	1.37939	0.757026	1.33512	0.689431	0.513493	0.247712	0.482739	0.114625		ns	ns	ns	ns	ns	ns	ns	ns	ns	ns	ns	ns	ns	ns	ns
1143	1143_plastidic aldolase [Nicotiana tabacum]	0.786127	0.0321879	1.30403	0.0673846	1.16476	0.337283	0.960965	0.0967291	1.22563	0.422851	1.0465	0.166269		ns	ns	ns	ns	ns	ns	ns	ns	ns	ns	ns	ns	ns	ns	ns
1144	1144_PREDICTED: 2-methylene-furan-3-one reductase [Nicotiana sylvestris]	0.853252	0.149365	1.1765	0.170148	1.28268	0.31196	0.925549	0.170494	1.06418	0.216662	1.15492	0.0639513		ns	ns	ns	ns	ns	ns	ns	ns	ns	ns	ns	ns	ns	ns	ns
1145	1145_PREDICTED: 2-methylene-furan-3-one reductase [Nicotiana sylvestris]	0.792853	0.0535161	1.18778	0.222067	1.27329	0.169946	0.959461	0.245417	1.20669	0.115904	1.16234	0.224186		ns	ns	ns	ns	ns	ns	ns	ns	ns	ns	ns	ns	ns	ns	ns
1150	mix (photosystem II stability/assembly factor HCF136 + fructose-bisphosphate aldolase 2)	0.878202	0.15715	1.07691	0.363759	0.599864	0.121105	0.741287	0.245859	0.666326	0.0428102	0.841553	0.0857236		ns	ns	ns	ns	ns	ns	ns	*	ns	ns	*	ns	*	*	ns
1162	1162_PREDICTED: ATP synthase gamma chain, chloroplastic [Nicotiana tomentosiformis]	0.492772	0.0811	1.04287	0.137298	1.95329	0.511027	0.610148	0.162472	0.966473	0.0670561	0.826772	0.172812		ns	ns	*	ns	ns	ns	*	ns	ns	*	ns	ns	*	*	*
1165	1165_PREDICTED: chloroplast stem-loop binding protein of 41 kDa b, chloroplastic [Nicotiana tomentosiformis]	1.2245	0.163062	0.848124	0.142822	1.35912	0.940787	1.0378	0.37504	0.642422	0.299654	0.644689	0.174196		ns	ns	ns	ns	ns	ns	ns	ns	ns	ns	ns	ns	ns	ns	ns
1166	Unknown	0.968041	0.187368	0.768751	0.0775793	1.26183	0.515662	0.956782	0.341564	0.655232	0.128054	0.637566	0.252989		ns	ns	ns	ns	ns	ns	ns	ns	ns	ns	ns	ns	ns	ns	ns
1169	Unknown	1.14843	0.130873	0.728202	0.0677322	0.992328	0.397183	0.977138	0.240042	0.5425	0.0875448	0.609579	0.184801		ns	ns	ns	ns	ns	ns	ns	ns	ns	ns	ns	ns	ns	ns	ns
1170	1170_PREDICTED: chloroplast stem-loop binding protein of 41 kDa b, chloroplastic [Nicotiana tomentosiformis]	1.52036	0.250264	0.803175	0.159004	2.06909	1.90796	1.62254	1.03026	0.57508	0.301466	0.588659	0.133911		ns	ns	ns	ns	ns	ns	ns	ns	ns	ns	ns	ns	ns	ns	ns
1173	1173_PREDICTED: 2-methylene-furan-3-one reductase [Nicotiana tomentosiformis]	0.716396	0.0635444	1.14515	0.196283	1.0966	0.196228	0.836118	0.14873	1.09169	0.160001	1.02033	0.0346964		ns	ns	ns	ns	ns	ns	ns	ns	ns	ns	ns	ns	ns	ns	ns
1175	1175_PREDICTED: malate dehydrogenase, mitochondrial [Nicotiana tomentosiformis]	1.24375	0.133612	0.639575	0.0897783	0.895347	0.368355	1.22839	0.357848	0.494549	0.0954049	0.644622	0.137929		ns	ns	ns	ns	ns	ns	ns	ns	ns	ns	ns	ns	ns	ns	ns
1181	1181_PREDICTED: 2-methylene-furan-3-one reductase [Nicotiana tomentosiformis]	0.821761	0.118665	1.14689	0.0482576	1.03419	0.19376	0.883079	0.151006	1.03773	0.0112083	1.08328	0.104401		ns	ns	ns	ns	ns	ns	ns	ns	ns	ns	ns	ns	ns	ns	ns
1189	1189_PREDICTED: 2-methylene-furan-3-one reductase [Nicotiana tomentosiformis]	0.701262	0.195149	1.17706	0.223282	1.18125	0.244217	0.863897	0.170509	1.08201	0.113124	1.17148	0.205183		ns	ns	ns	ns	ns	ns	ns	ns	ns	ns	ns	ns	ns	ns	ns
1191	1191_PREDICTED: 2-methylene-furan-3-one reductase [Nicotiana tomentosiformis]	0.619756	0.0998387	1.16066	0.240177	1.17867	0.12904	0.950422	0.280191	1.09173	0.234833	1.08824	0.369569		ns	ns	ns	ns	ns	ns	ns	ns	ns	ns	ns	ns	ns	ns	ns
1196	1196_PREDICTED: peptidyl-prolyl cis-trans isomerase CYP37, chloroplastic-like, partial [Nicotiana tomentosiformis]	1.06304	0.167767	1.09601	0.203736	0.832998	0.0950304	1.12582	0.287719	0.725025	0.0959123	0.864851	0.193358		ns	ns	ns	ns	ns	ns	ns	ns	ns	ns	ns	ns	ns	ns	ns
1197	Unknown	0.777874	0.13477	0.813353	0.129405	0.674651	0.143088	0.852152	0.17496	0.748975	0.153763	0.726288	0.193197		ns	ns	ns	ns	ns	ns	ns	ns	ns	ns	ns	ns	ns	ns	ns
1199	1199_mitochondrial malate dehydrogenase [Nicotiana tabacum]	1.10887	0.274431	0.547468	0.119067	0.788697	0.292174	1.17751	0.367551	0.547821	0.0666659	0.635139	0.200127		ns	ns	ns	ns	ns	ns	ns	ns	ns	ns	ns	ns	ns	ns	ns
1206	Unknown	1.04041	0.235655	0.665946	0.0347279	0.694588	0.157105	1.01341	0.158379	0.686933	0.0732637	0.729927	0.0975901		ns	ns	ns	ns	ns	ns	ns	ns	ns	ns	ns	ns	ns	ns	ns
1220	Unknown	1.39917	0.0945576	0.744614	0.146819	0.912751	0.246231	1.25403	0.254823	1.00348	0.157607	1.02528	0.347228		ns	ns	ns	ns	ns	ns	ns	ns	ns	ns	ns	ns	ns	ns	ns
1222	Unknown	1.66612	0.682262	0.846086	0.183219	1.05288	0.233968	1.34045	0.138147	0.909964	0.27481	0.947167	0.264173		ns	ns	ns	ns	ns	ns	ns	ns	ns	ns	ns	ns	ns	ns	ns
1226	Unknown	0.76311	0.153418	0.689978	0.146138	0.553984	0.10267	0.770288	0.216255	0.721167	0.146674	0.715618	0.0789296		ns	ns	ns	ns	ns	ns	ns	ns	ns	ns	ns	ns	ns	ns	ns
1227	1227_PREDICTED: ferredoxin--NADP reductase, leaf-type isozyme, chloroplastic [Nicotiana tomentosiformis]	0.972984	0.135591	1.02406	0.194333	0.734922	0.0729328	0.849637	0.103017	0.747046	0.0780175	0.85997	0.264325		ns	ns	ns	ns	ns	ns	ns	ns	ns	ns	ns	ns	ns	ns	ns
1233	Unknown	0.883483	0.0903196	0.832419	0.206331	1.07971	0.186827	1.20401	0.31845	1.15451	0.110348	1.13574	0.247487		ns	ns	ns	ns	ns	ns	ns	ns	ns	ns	ns	ns	ns	ns	ns
1238	1238_annexin [Nicotiana tabacum]	0.927163	0.0567872	0.921783	0.163776	0.844735	0.072792	1.06832	0.0879976	1.00596	0.103397	0.925484	0.111875		ns	ns	ns	ns	ns	ns	ns	ns	ns	ns	ns	ns	ns	ns	ns
1254	1254_PREDICTED: enoyl-[acyl-carrier-protein] reductase [NADH], chloroplastic [Nicotiana sylvestris]	1.12256	0.103271	0.701917	0.215004	0.923669	0.177878	1.21904	0.365169	0.635026	0.26011	0.780631	0.137862		ns	ns	ns	ns	ns	ns	ns	ns	ns	ns	ns	ns	ns	ns	ns
1267	Unknown	1.25331	0.298331	0.532246	0.106986	0.680947	0.478679	1.33691	0.368176	0.381292	0.128915	0.446925	0.266829		ns	ns	ns	ns	ns	ns	ns	ns	ns	ns	ns	ns	ns	ns	ns
1269	Unknown	1.19493	0.109717	0.749002	0.177062	0.944651	0.235989	1.20935	0.298673	0.57844	0.192929	0.837884	0.0651112		ns	ns	ns	ns	ns	ns	ns	ns	ns	ns	ns	ns	ns	ns	ns
1271	1271_PREDICTED: ferredoxin--NADP reductase, leaf-type isozyme, chloroplastic [Nicotiana sylvestris]	1.31922	0.235615	0.381109	0.079268	0.672766	0.38529	1.44099	0.493622	0.28631	0.0278025	0.477065	0.279578		ns	ns	ns	ns	ns	ns	ns	ns	ns	ns	ns	ns	ns	ns	ns
1272	Unknown	1.27088	0.142517	0.403433	0.0416788	0.61496	0.352292	1.642	0.79391	0.25169	0.0530583	0.43953	0.310347		ns	ns	ns	ns	ns	ns	ns	ns	ns	ns	ns	ns	ns	ns	ns
1274	1274_PREDICTED: ferredoxin--NADP reductase, leaf-type isozyme, chloroplastic [Nicotiana tomentosiformis]	1.04165	0.15609	0.497936	0.116943	0.671697	0.249577	1.18146	0.226671	0.470616	0.159614	0.604505	0.215117		ns	ns	ns	ns	ns	ns	ns	ns	ns	ns	ns	ns	ns	ns	ns
1277	1277_PREDICTED: ferredoxin--NADP reductase, leaf-type isozyme, chloroplastic [Nicotiana tomentosiformis]	1.08733	0.22925	0.79089	0.16558	0.876091	0.11519	1.09185	0.296997	0.599278	0.131217	0.741424	0.146815		ns	ns	ns	ns	ns	ns	ns	ns	ns	ns	ns	ns	ns	ns	ns
1278	1278_PREDICTED: ferredoxin--NADP reductase, leaf-type isozyme, chloroplastic [Nicotiana tomentosiformis]	1.18477	0.0781721	0.436424	0.0862256	0.771548	0.380689	1.4382	0.466899	0.451298	0.265495	0.696132	0.2074		ns	ns	ns	ns	ns	ns	ns	ns	ns	ns	ns	ns	ns	ns	ns
1279	1279_PREDICTED: ferredoxin--NADP reductase, leaf-type isozyme, chloroplastic [Nicotiana tomentosiformis]	1.31546	0.189447	0.46276	0.0853187	0.822824	0.540395	1.54083	0.592493	0.268623	0.168256	0.541684	0.307484		ns	ns	ns	ns	ns	ns	ns	ns	ns	ns	ns	ns	ns	ns	ns
1280	1280_PREDICTED: ferredoxin--NADP reductase, leaf-type isozyme, chloroplastic [Nicotiana sylvestris]	1.29762	0.0823779	0.459613	0.0843233	0.801416	0.316822	1.68926	0.880003	0.269816	0.119541	0.496152	0.248988		ns	ns	ns	ns	ns	ns	ns	ns	ns	ns	ns	ns	ns	ns	ns
1283	1283_PREDICTED: 30S ribosomal protein S5, chloroplastic [Nicotiana sylvestris]	0.931768	0.169924	0.95999	0.0632399	1.04749	0.32429	1.31864	0.337461	0.936493	0.0836864	0.80169	0.167978		ns	ns	ns	ns	ns	ns	ns	ns	ns	ns	ns	ns	ns	ns	ns
1301	1301_PREDICTED: mitochondrial outer membrane protein porin of 36 kDa [Nicotiana sylvestris]	0.743557	0.0733541	1.08109	0.377061	1.29234	0.160534	0.735858	0.0803456	1.07107	0.104462	1.05438	0.324868		ns	ns	ns	ns	ns	ns	ns	ns	ns	ns	ns	ns	ns	ns	ns
1303	1303_PREDICTED: auxin-binding protein ABP19a-like [Nicotiana tomentosiformis]	1.13288	0.14784	0.790781	0.199522	1.08766	0.194414	1.31405	0.106213	0.825081	0.214872	0.779117	0.143778		ns	ns	ns	ns	ns	ns	ns	ns	ns	ns	ns	ns	ns	ns	ns
1306	1306_PREDICTED: auxin-binding protein ABP19a-like [Nicotiana tomentosiformis]	1.03389	0.03451	0.725926	0.054606	1.16126	0.290691	1.21949	0.203254	0.845263	0.104558	0.76266	0.196784		ns	ns	ns	ns	ns	ns	ns	ns	ns	ns	ns	ns	ns	ns	ns
1309	Unknown	1.20223	0.332645	0.542782	0.146724	0.919557	0.223404	1.50222	0.175101	0.900767	0.260228	0.758126	0.160227		ns	ns	ns	ns	ns	ns	ns	ns	ns	ns	ns	ns	ns	ns	ns
1312	1312_cytochrome f [Nicotiana tabacum]	1.17085	0.102519	0.859724	0.179143	1.29996	0.337974	1.22006	0.342786	0.878301	0.17868	0.895	0.232839		ns	ns	ns	ns	ns	ns	ns	ns	ns	ns	ns	ns	ns	ns	ns
1320	Unknown	0.856729	0.0828129	0.982261	0.136015	1.20274	0.156844	0.923729	0.117393	1.05662	0.135445	1.04172	0.35455		ns	ns	ns	ns	ns	ns	ns	ns	ns	ns	ns	ns	ns	ns	ns
1332	1332_PREDICTED: elongation factor 1-delta 1-like [Nicotiana tomentosiformis]	0.968629	0.0946451	0.916397	0.129306	0.860836	0.2176	1.07099	0.30126	0.984392	0.0905282	0.761287	0.135526		ns	ns	ns	ns	ns	ns	ns	ns	ns	ns	ns	ns	ns	ns	ns
1335	Unknown	0.985519	0.354431	0.88626	0.28018	1.35872	0.483444	1.14142	0.372373	0.72021	0.102943	1.05717	0.010675		ns	ns	ns	ns	ns	ns	*	ns	ns	ns	ns	ns	*	ns	ns
1337	1337_PREDICTED: probable xyloglucan endotransglucosylase/hydrolase protein 7 [Nicotiana tomentosiformis]	1.43459	0.285899	0.709494	0.101806	0.537243	0.21748	1.21417	0.227871	0.654783	0.0505604	0.532749	0.0658956		ns	ns	ns	ns	ns	ns	ns	ns	ns	ns	ns	ns	ns	ns	ns
1340	Unknown	1.16752	0.190029	1.09434	0.391629	1.44289	0.142764	0.94524	0.255267	0.918304	0.202271	0.97881	0.0136477		ns	ns	ns	ns	ns	ns	ns	ns	ns	ns	ns	ns	ns	ns	ns
1344	Unknown	0.70509	0.143827	0.969908	0.239336	1.10222	0.0756864	0.923476	0.16196	0.994462	0.146012	1.0171	0.152864		ns	ns	ns	ns	ns	ns	ns	ns	ns	ns	ns	ns	ns	ns	ns
1355	1355_cytochrome f [Nicotiana tabacum]	1.53162	0.181379	0.586199	0.133508	0.453496	0.0885676	1.31557	0.339784	0.625377	0.127094	0.522802	0.122641		ns	ns	ns	ns	ns	ns	ns	ns	ns	ns	ns	ns	ns	ns	ns
1359	Unknown	1.38755	0.286484	0.53281	0.0407873	0.554509	0.252101	1.05398	0.131086	0.712257	0.102728	0.62117	0.209109		ns	ns	ns	ns	ns	ns	ns	ns	ns	ns	ns	ns	ns	ns	ns
1360	1360_PREDICTED: oxygen-evolving enhancer protein 1, chloroplastic [Solanum lycopersicum]	0.733357	0.102878	0.548731	0.138297	0.880637	0.510702	1.27635	0.276675	0.837045	0.332993	0.970642	0.311102		ns	ns	ns	ns	ns	ns	ns	ns	ns	ns	ns	ns	ns	ns	ns
1361	1361_PREDICTED: oxygen-evolving enhancer protein 1, chloroplastic [Nicotiana sylvestris]	0.902998	0.249377	0.529278	0.279024	0.938812	0.127003	1.38292	0.373588	0.785605	0.468187	0.901657	0.251511		ns	ns	ns	ns	ns	ns	ns	ns	ns	ns	ns	ns	ns	ns	ns
1362	Oxygen-evolving enhancer protein 1	1.7804	0.246597	1.65862	0.656536	1.69487	0.438401	0.748942	0.103482	0.851922	0.348306	0.762074	0.198238		ns	ns	*	*	*	ns	*	*	*	*	*	*	ns	ns	ns
1366	Unknown	1.16802	0.330494	0.919995	0.311084	1.41366	0.451446	1.00919	0.321391	0.829419	0.169062	1.02547	0.0309048		ns	ns	ns	ns	ns	ns	*	ns	ns	ns	ns	ns	ns	ns	ns
1369	Unknown	0.729693	0.244369	0.446823	0.221749	0.76923	0.315254	1.11432	0.0620106	0.881654	0.415791	0.734975	0.150875		ns	ns	ns	ns	ns	ns	ns	ns	ns	ns	ns	ns	ns	ns	ns
1382	Unknown	0.922552	0.0772227	1.26901	0.286747	0.824692	0.160342	0.979126	0.172031	1.26913	0.151148	1.004	0.31323		ns	ns	ns	ns	ns	ns	ns	ns	ns	ns	ns	ns	ns	ns	ns
1383	Unknown	0.914489	0.137175	0.863382	0.124372	0.80814	0.0570359	0.954309	0.163044	0.699242	0.131822	0.730798	0.107306		ns	ns	ns	ns	ns	ns	ns	ns	ns	ns	ns	ns	ns	ns	ns
1396	Unknown	1.1573	0.180312	0.578662	0.0361826	0.849081	0.115884	1.02112	0.112833	0.680312	0.00852856	0.742692	0.114534		ns	ns	ns	ns	ns	ns	ns	ns	ns	ns	ns	ns	ns	ns	ns
1397	1397_PREDICTED: gamma carbonic anhydrase 1, mitochondrial-like [Nicotiana tomentosiformis]	1.4165	0.197868	0.612748	0.0493944	0.799647	0.163375	0.988901	0.128525	0.640157	0.0828371	0.636861	0.138781		ns	ns	ns	ns	ns	ns	ns	ns	ns	ns	ns	ns	ns	ns	ns
1398	1398_PREDICTED: ribosome-binding factor PSRP1, chloroplastic [Nicotiana tomentosiformis]	1.2185	0.4275	0.971878	0.0317517	1.08891	0.251717	1.72969	0.774742	1.08509	0.222109	1.05658	0.100185		ns	ns	ns	ns	ns	ns	ns	ns	ns	ns	ns	ns	ns	ns	ns
1399	Unknown	1.57675	0.353886	0.62433	0.0337868	0.886325	0.330696	1.03802	0.197783	0.551354	0.101341	0.500976	0.111232		ns	ns	ns	ns	ns	ns	ns	ns	ns	ns	ns	ns	ns	ns	ns
1409	1409_PREDICTED: probable plastid-lipid-associated protein 13, chloroplastic [Nicotiana tomentosiformis]	0.962244	0.339345	1.16515	0.340426	0.789219	0.251327	0.669475	0.230925	1.23765	0.325891	1.37497	0.0881799		ns	ns	ns	ns	ns	ns	ns	ns	ns	ns	ns	ns	ns	ns	ns
1415	Unknown	0.738944	0.066564	1.1222	0.346119	1.16128	0.259581	1.00903	0.0962025	1.19376	0.125661	1.23243	0.361954		ns	ns	ns	ns	ns	ns	ns	ns	ns	ns	ns	ns	ns	ns	ns
1416	1416_RecName: Full=29 kDa ribonucleoprotein B, chloroplastic; AltName: Full=CP29B; Flags: Precursor [Nicotiana sylvestris]	0.7021	0.120953	1.46961	0.61922	1.05775	0.220956	0.819925	0.139341	1.54881	0.273011	1.22291	0.495818		ns	ns	ns	ns	ns	ns	ns	ns	ns	ns	ns	ns	ns	ns	ns
1418	Unknown	0.665075	0.0561078	1.15391	0.379335	0.824018	0.486209	0.897312	0.197847	1.41919	0.334339	1.18442	0.529832		ns	ns	ns	ns	ns	ns	ns	ns	ns	ns	ns	ns	ns	ns	ns
1419	Unknown	0.863435	0.100295	1.15896	0.289244	1.47442	0.188107	1.02708	0.0698882	1.40108	0.175814	1.57236	0.608857		ns	ns	ns	ns	ns	ns	ns	ns	ns	ns	ns	ns	ns	ns	ns
1420	1420_putative NAD-dependent dehydrogenase 2 [Erythroxylum coca]	1.01725	0.128612	0.759063	0.143792	1.02764	0.0502408	1.08679	0.131846	0.712267	0.0476	0.761759	0.0492056		ns	*	*	ns	*	*	*	ns	*	ns	*	ns	*	ns	*
1424	1424_putative NAD-dependent dehydrogenase 2 [Erythroxylum coca]	0.870358	0.105985	0.914371	0.20011	1.12226	0.0695373	0.892514	0.076213	0.892752	0.105515	0.988089	0.0609892		ns	ns	ns	ns	ns	ns	ns	ns	ns	ns	ns	ns	ns	ns	ns
1429	1429_putative NAD-dependent dehydrogenase 2 [Erythroxylum coca]	0.956568	0.112438	1.27093	0.124816	1.37588	0.441841	1.08476	0.190376	1.39378	0.376407	1.5498	0.355897		ns	ns	ns	ns	ns	ns	ns	ns	ns	ns	ns	ns	ns	ns	ns
1431	1431_putative NAD-dependent dehydrogenase 2 [Erythroxylum coca]	0.908447	0.0573083	0.990136	0.204305	1.17054	0.151437	0.810102	0.0392437	1.45127	0.124624	1.08694	0.0848556		*	*	ns	ns	ns	*	*	*	*	*	ns	ns	ns	*	ns
1432	1432_putative NAD-dependent dehydrogenase 2 [Erythroxylum coca]	0.914247	0.0548285	0.853056	0.094437	1.12537	0.0777352	1.15666	0.0165268	0.819186	0.0433784	0.905826	0.171967		ns	ns	ns	ns	ns	ns	ns	ns	ns	ns	ns	ns	ns	ns	ns
1435	1435_putative NAD-dependent dehydrogenase 2 [Erythroxylum coca]	1.07448	0.270895	0.650303	0.0776017	1.38176	0.671856	1.16992	0.159317	0.652995	0.0593881	0.753514	0.133673		ns	ns	ns	ns	ns	ns	ns	ns	ns	ns	ns	ns	ns	ns	ns
1441	Unknown	0.896171	0.201137	0.927692	0.391262	0.870959	0.113334	1.17662	0.184755	1.68417	0.308853	1.17113	0.131812		ns	ns	ns	ns	ns	ns	ns	ns	ns	ns	ns	ns	ns	ns	ns
1448	Unknown	0.645224	0.0212355	0.697835	0.137439	1.51764	0.854873	1.04539	0.216369	0.870224	0.172471	1.12879	0.68858		ns	ns	ns	ns	ns	ns	ns	ns	ns	ns	ns	ns	ns	ns	ns
1458	Proteasome subunit alpha type-6	0.696071	0.0536502	0.654575	0.1865	1.64913	0.646439	1.35945	0.444676	0.867727	0.206807	0.902942	0.0789713		ns	*	*	ns	ns	*	*	ns	ns	ns	*	*	*	*	ns
1459	Unknown	0.887726	0.0538358	1.23089	0.467357	1.11492	0.258276	0.952327	0.373241	1.57703	0.639638	1.03931	0.502121		ns	ns	ns	ns	ns	ns	ns	ns	ns	ns	ns	ns	ns	ns	ns
1467	1467_PREDICTED: triosephosphate isomerase, cytosolic isoform X2 [Nicotiana sylvestris]	0.904097	0.0657403	0.621719	0.0624629	1.52835	0.968536	0.88263	0.363243	0.521293	0.058092	0.53853	0.114766		ns	ns	ns	ns	ns	ns	ns	ns	ns	ns	ns	ns	ns	ns	ns
1470	Unknown	0.785409	0.0652569	0.467477	0.0898335	1.68723	1.5385	1.15518	0.993673	0.350735	0.0508372	0.459683	0.0382359		ns	ns	ns	ns	ns	ns	ns	ns	ns	ns	ns	ns	ns	ns	ns
1471	Unknown	1.15327	0.191563	0.822436	0.0878265	1.37459	0.39288	1.20924	0.403288	0.771867	0.227475	0.869012	0.100341		ns	ns	ns	ns	ns	ns	ns	ns	ns	ns	ns	ns	ns	ns	ns
1481	1481_PREDICTED: acid phosphatase 1-like [Nicotiana tomentosiformis]	1.18749	0.0713549	0.583174	0.123949	0.717753	0.181056	1.18846	0.325274	0.709032	0.0634838	0.476011	0.113013		ns	ns	ns	ns	ns	ns	ns	ns	ns	ns	ns	ns	ns	ns	ns
1485	1485_PREDICTED: probable ATP synthase 24 kDa subunit, mitochondrial [Nicotiana tomentosiformis]	0.761382	0.135882	0.876276	0.141548	1.31638	0.445998	1.23896	0.542824	1.23223	0.400484	1.15061	0.207067		ns	ns	ns	ns	ns	ns	ns	ns	ns	ns	ns	ns	ns	ns	ns
1487	Unknown	1.26966	0.201576	0.533456	0.120297	0.658363	0.041751	0.981524	0.0863354	0.627774	0.0112751	0.589678	0.0660364		ns	ns	ns	ns	ns	ns	ns	ns	ns	ns	ns	ns	ns	ns	ns
1492	Unknown	0.544917	0.0689327	0.602842	0.161104	3.75707	4.61715	2.2073	3.07354	0.410321	0.104098	0.67342	0.344106		ns	ns	ns	ns	ns	ns	ns	ns	ns	ns	ns	ns	ns	ns	ns
1506	1506_PREDICTED: chlorophyll a-b binding protein 40, chloroplastic-like [Nicotiana sylvestris]	1.21884	0.24875	1.02774	0.303824	1.02832	0.216137	1.3893	0.385409	1.12201	0.553158	1.26867	0.403083		ns	ns	ns	ns	ns	ns	ns	ns	ns	ns	ns	ns	ns	ns	ns
1507	Unknown	1.00407	0.200467	0.828074	0.301581	1.00253	0.372659	1.09786	0.360038	0.699985	0.107088	0.701626	0.169034		ns	ns	ns	ns	ns	ns	ns	ns	ns	ns	ns	ns	ns	ns	ns
1509	Unknown	0.989085	0.245595	0.7043	0.0352834	1.32869	0.672675	1.39914	0.557244	0.692104	0.147593	0.727337	0.0968284		ns	ns	ns	ns	ns	ns	ns	ns	ns	ns	ns	ns	ns	ns	ns
1519	1519_PREDICTED: chlorophyll a-b binding protein 40, chloroplastic-like [Nicotiana sylvestris]	0.855618	0.278905	0.591316	0.219517	0.647337	0.14281	0.774756	0.143408	0.564438	0.114635	0.579869	0.195523		ns	ns	ns	ns	ns	ns	ns	ns	ns	ns	ns	ns	ns	ns	ns
1550	Ribulose-phosphate 3-epimerase	1.39013	0.228846	0.861709	0.126109	1.25659	0.339001	1.00936	0.120579	0.680728	0.218645	0.775393	0.0540213		ns	ns	*	ns	*	ns	*	ns	*	ns	ns	ns	ns	ns	*
1551	1551_PREDICTED: 30S ribosomal protein 2, chloroplastic [Nicotiana tomentosiformis]	1.1613	0.207137	1.00908	0.488263	1.37012	0.313783	1.1233	0.583857	1.11758	0.366574	1.01333	0.332913		ns	ns	ns	ns	ns	ns	ns	ns	ns	ns	ns	ns	ns	ns	ns
1553	Putative glutathione S-transferase	0.913497	0.142624	0.626454	0.159551	0.824867	0.255191	1.51864	0.310353	0.826522	0.142891	0.801471	0.0962684		ns	*	ns	ns	ns	*	ns	ns	ns	*	*	*	ns	ns	ns
1563	1563_PREDICTED: 20 kDa chaperonin, chloroplastic-like [Nicotiana tomentosiformis]	1.67288	0.702044	1.60589	0.529586	1.41342	0.0991863	1.70522	0.586211	1.27877	0.436393	1.04451	0.295364		ns	ns	ns	ns	ns	ns	ns	ns	ns	ns	ns	ns	ns	ns	ns
1564	Unknown	1.43074	0.242906	0.857185	0.264748	1.16574	0.354374	1.35058	0.178983	0.631256	0.108038	0.66713	0.0620662		ns	ns	ns	ns	ns	ns	ns	ns	ns	ns	ns	ns	ns	ns	ns
1568	Unknown	1.08822	0.388076	1.24926	0.171861	1.16212	0.0726345	0.983398	0.107497	1.24872	0.299387	1.14378	0.165691		ns	ns	ns	ns	ns	ns	ns	ns	ns	ns	ns	ns	ns	ns	ns
1571	1571_PREDICTED: oxygen-evolving enhancer protein 2-3, chloroplastic [Nicotiana tomentosiformis]	1.18546	0.176378	0.860523	0.35312	1.084	0.115632	1.19107	0.139177	0.657221	0.118837	0.664159	0.105809		ns	ns	ns	ns	ns	ns	ns	ns	ns	ns	ns	ns	ns	ns	ns
1572	1572_PREDICTED: 20 kDa chaperonin, chloroplastic [Nicotiana sylvestris]	1.2201	0.455027	1.43495	0.237278	0.988357	0.0800104	1.27149	0.460585	1.63138	0.433013	1.06365	0.219373		ns	ns	ns	ns	ns	ns	ns	ns	ns	ns	ns	ns	ns	ns	ns
1575	1575_PREDICTED: 20 kDa chaperonin, chloroplastic-like [Nicotiana sylvestris]	1.24881	0.500162	1.47053	0.277964	1.32374	0.0942264	1.56046	0.572103	1.49873	0.467451	1.19665	0.220689		ns	ns	ns	ns	ns	ns	ns	ns	ns	ns	ns	ns	ns	ns	ns
1593	1593_PREDICTED: oxygen-evolving enhancer protein 2-3, chloroplastic [Nicotiana tomentosiformis]	1.94996	0.312529	1.43285	0.877901	1.19873	0.151021	1.33076	0.740204	0.608145	0.292194	0.782711	0.343906		ns	ns	ns	ns	ns	ns	ns	ns	ns	ns	ns	ns	ns	ns	ns
1595	Unknown	1.26626	0.100496	0.893425	0.431931	0.887858	0.250536	0.97337	0.252279	0.760977	0.189647	0.725742	0.119693		ns	ns	ns	ns	ns	ns	ns	ns	ns	ns	ns	ns	ns	ns	ns
1601	1601_Chain A, Crystal Structure Of Psbp Protein In The Oxygen-Evolving Complex Of Photosystem Ii From Higher Plants	0.796073	0.163646	0.540355	0.229878	0.686475	0.169242	1.01222	0.259362	0.60963	0.18727	0.600726	0.10282		ns	ns	ns	ns	ns	ns	ns	ns	ns	ns	ns	ns	ns	ns	ns
1609	1609_RecName: Full=Superoxide dismutase [Fe], chloroplastic, partial [Nicotiana plumbaginifolia]	0.636884	0.155874	0.993548	0.443056	1.2839	0.51911	1.06116	0.12083	1.21903	0.204225	1.14539	0.387815		ns	ns	ns	ns	ns	ns	ns	ns	ns	ns	ns	ns	ns	ns	ns
1618	1618_photosystem II oxygen-evolving complex protein 2 - Arabidopsis thaliana (fragment)	2.07707	0.599998	1.01912	0.487214	1.22705	0.104025	1.87455	0.499655	0.648639	0.268018	0.682148	0.299865		ns	ns	ns	ns	ns	ns	ns	ns	ns	ns	ns	ns	ns	ns	ns
1627	1627_2-Cys peroxiredoxin, partial [Nicotiana benthamiana]	0.793162	0.204112	1.07097	0.432885	1.18672	0.182747	1.05608	0.206647	1.10154	0.206666	1.30311	0.880068		ns	ns	ns	ns	ns	ns	ns	ns	ns	ns	ns	ns	ns	ns	ns
1630	1630_PREDICTED: oxygen-evolving enhancer protein 2-3, chloroplastic [Nicotiana tomentosiformis]	0.990466	0.264063	0.455561	0.0763795	0.598319	0.265627	0.8014	0.252514	0.54143	0.180275	0.482912	0.0888127		ns	ns	ns	ns	ns	ns	ns	ns	ns	ns	ns	ns	ns	ns	ns
1632	1632_photosystem II 23 kDa polypeptide [Nicotiana tabacum]	0.97137	0.138861	0.555489	0.0367337	0.732707	0.185762	0.813485	0.166922	0.545023	0.0718068	0.558509	0.111418		ns	ns	ns	ns	ns	ns	ns	ns	ns	ns	ns	ns	ns	ns	ns
1637	1637_PREDICTED: auxin-binding protein ABP19a [Nicotiana tomentosiformis]	1.26938	0.0289276	0.920669	0.315414	1.42244	0.123784	1.27168	0.253991	1.15009	0.24699	0.971771	0.239073		ns	ns	ns	ns	ns	ns	ns	ns	ns	ns	ns	ns	ns	ns	ns
1639	1639_PREDICTED: 2-Cys peroxiredoxin BAS1, chloroplastic-like [Nicotiana sylvestris]	0.765939	0.198822	0.923888	0.363294	0.916908	0.292728	1.01745	0.126553	0.829456	0.156618	0.72623	0.109842		ns	ns	ns	ns	ns	ns	ns	ns	ns	ns	ns	ns	ns	ns	ns
1640	1640_PREDICTED: 2-Cys peroxiredoxin BAS1, chloroplastic [Nicotiana tomentosiformis]	0.607897	0.0339412	1.32166	0.722935	0.881358	0.471427	1.22481	0.579281	0.977217	0.100323	0.698837	0.123089		ns	ns	ns	ns	ns	ns	ns	ns	ns	ns	ns	ns	ns	ns	ns
1649	1649_PREDICTED: 2-Cys peroxiredoxin BAS1-like, chloroplastic-like [Solanum tuberosum]	0.888504	0.227615	0.613922	0.206647	0.615505	0.381585	0.810825	0.236661	0.711521	0.196389	0.705164	0.138603		ns	ns	ns	ns	ns	ns	ns	ns	ns	ns	ns	ns	ns	ns	ns
1663	1663_PREDICTED: photosystem I reaction center subunit II, chloroplastic [Nicotiana tomentosiformis]	1.01409	0.440833	0.443643	0.085101	0.851646	0.253436	1.02912	0.228286	0.728129	0.104143	0.704554	0.226359		ns	ns	ns	ns	ns	ns	ns	ns	ns	ns	ns	ns	ns	ns	ns
1670	1670_2-Cys peroxiredoxin, partial [Nicotiana benthamiana]	0.76131	0.232573	0.757811	0.251299	0.729484	0.105613	0.75632	0.220036	0.886408	0.173146	0.709059	0.0213517		ns	ns	ns	ns	ns	ns	ns	ns	ns	ns	ns	ns	ns	ns	ns
1675	1675_PREDICTED: auxin-binding protein ABP19a-like [Nicotiana tomentosiformis]	1.22762	0.269186	0.748072	0.140655	0.992646	0.122732	1.52158	0.195037	0.916828	0.227485	0.927594	0.285523		ns	ns	ns	ns	ns	ns	ns	ns	ns	ns	ns	ns	ns	ns	ns
1676	1676_ATP-dependent Clp protease proteolytic subunit [Nicotiana tabacum]	0.779871	0.15755	0.687711	0.0449134	0.649385	0.209737	0.676915	0.266977	0.680774	0.181804	0.637833	0.0565341		ns	ns	ns	ns	ns	ns	ns	ns	ns	ns	ns	ns	ns	ns	ns
1681	Unknown	1.80456	0.590632	0.954686	0.196134	0.999682	0.116631	1.6933	0.393819	0.970327	0.285816	0.899003	0.186533		ns	ns	ns	ns	ns	ns	ns	ns	ns	ns	ns	ns	ns	ns	ns
1686	1686_PREDICTED: auxin-binding protein ABP19a-like [Nicotiana tomentosiformis]	1.00596	0.21176	0.638953	0.237224	1.11992	0.196658	1.28845	0.201599	0.909505	0.269133	0.744077	0.185555		ns	ns	ns	ns	ns	ns	ns	ns	ns	ns	ns	ns	ns	ns	ns
1687	Unknown	1.2705	0.382076	0.429833	0.0657371	0.694641	0.568365	1.16752	0.444147	0.386637	0.10887	0.374798	0.0806114		ns	ns	ns	ns	ns	ns	ns	ns	ns	ns	ns	ns	ns	ns	ns
1688	1688_PREDICTED: auxin-binding protein ABP19a-like [Nicotiana tomentosiformis]	1.11759	0.140422	0.721756	0.230825	1.03085	0.0157566	1.36776	0.244437	0.800338	0.173293	0.754799	0.215278		ns	ns	ns	ns	ns	ns	ns	ns	ns	ns	ns	ns	ns	ns	ns
1693	Unknown	1.20552	0.369514	0.75882	0.183116	1.03108	0.557858	0.801109	0.202203	0.78158	0.0483354	0.736213	0.175596		ns	ns	ns	ns	ns	ns	ns	ns	ns	ns	ns	ns	ns	ns	ns
1697	Unknown	0.930795	0.20384	1.07254	0.298092	1.39844	0.145966	1.07287	0.119457	1.06456	0.446503	1.18824	0.730032		ns	ns	ns	ns	ns	ns	ns	ns	ns	ns	ns	ns	ns	ns	ns
1698	1698_PREDICTED: photosystem I reaction center subunit II, chloroplastic [Nicotiana tomentosiformis]	1.07903	0.421639	0.369541	0.0650907	0.764071	0.351704	0.987853	0.253323	0.312619	0.063415	0.452705	0.177324		ns	*	ns	ns	*	*	*	ns	*	ns	*	ns	*	ns	*
1702	Unknown	0.945379	0.256193	0.840793	0.137024	0.963657	0.110094	1.23475	0.396052	0.882552	0.110061	0.839964	0.133843		ns	ns	ns	ns	ns	ns	ns	ns	ns	ns	ns	ns	ns	ns	ns
1703	1703_PREDICTED: photosystem I reaction center subunit II, chloroplastic [Nicotiana sylvestris]	1.05755	0.318855	0.715975	0.108265	0.679814	0.182707	1.03622	0.164542	0.85562	0.286844	0.648591	0.0508144		ns	ns	ns	ns	ns	ns	ns	ns	ns	ns	ns	ns	ns	ns	ns
1709	Unknown	0.969085	0.119009	0.707768	0.0180196	0.803416	0.206861	1.15079	0.0876631	0.766483	0.0448717	0.709844	0.0807782		ns	ns	ns	ns	ns	ns	ns	ns	ns	ns	ns	ns	ns	ns	ns
1714	1714_PREDICTED: photosystem I reaction center subunit II, chloroplastic [Nicotiana sylvestris]	1.91809	0.150225	0.673821	0.288849	1.18907	0.612942	1.58072	0.531701	0.634461	0.084212	0.743181	0.0573619		ns	ns	ns	ns	ns	ns	ns	ns	ns	ns	ns	ns	ns	ns	ns
1721	Photosynthetic NDH subunit of lumenal location 5	0.961017	0.0487473	0.995814	0.16783	0.774441	0.108216	1.33304	0.266054	1.09744	0.223869	0.916729	0.297507		ns	*	ns	ns	ns	ns	*	ns	ns	*	*	*	ns	ns	ns
1732	Unknown	1.68336	0.433306	1.61792	0.729909	1.3063	0.133445	1.89239	0.856608	1.33136	0.356392	1.09986	0.427053		ns	ns	ns	ns	ns	ns	ns	ns	ns	ns	ns	ns	ns	ns	ns
1749	Unknown	1.08915	0.156814	0.951997	0.40461	0.992489	0.482176	1.60216	0.579817	0.852148	0.122053	0.952504	0.285081		ns	ns	ns	ns	ns	ns	ns	ns	ns	ns	ns	ns	ns	ns	ns
1752	1752_PREDICTED: peptidyl-prolyl cis-trans isomerase CYP20-2, chloroplastic [Nicotiana sylvestris]	0.843235	0.307504	0.42006	0.0653842	0.600791	0.318187	1.08857	0.186462	0.666545	0.234438	0.662851	0.27381		ns	ns	ns	ns	ns	ns	ns	ns	ns	ns	ns	ns	ns	ns	ns
1758	17.6 kDa class I heat shock protein 3-like [Nicotiana sylvestris]	0.375235	0.0861273	1.87289	0.807759	0.434993	0.0969256	0.413964	0.289163	6.15322	3.25944	0.939241	0.668994		*	ns	ns	ns	ns	*	*	*	*	ns	ns	ns	ns	ns	*
1763	17.8 kDa class I heat shock protein-like	0.581949	0.132571	2.11566	0.28107	0.453636	0.177442	0.410962	0.0178571	4.23234	1.44096	0.603181	0.257899		*	ns	ns	*	ns	*	*	*	*	ns	*	ns	*	ns	*
1772	1772_cytosolic class I small heat shock protein 3B [Nicotiana tabacum]	0.501399	0.179174	2.30748	0.495854	0.600464	0.0960442	0.320967	0.0778054	3.49567	1.44317	0.711275	0.31305		ns	ns	ns	ns	ns	ns	ns	ns	ns	ns	ns	ns	ns	ns	ns
1776	uncharacterized protein LOC107805303 isoform X2 [Nicotiana tabacum]	1.47586	0.190674	1.09839	0.276089	1.31945	0.294416	1.13781	0.160402	1.16762	0.322856	0.998711	0.0548371		ns	ns	ns	ns	*	ns	ns	ns	ns	ns	ns	ns	ns	ns	ns
1777	17.6 kDa class I heat shock protein 3-like [Nicotiana sylvestris]	1.08565	0.331198	1.37342	0.126235	0.708325	0.234795	0.500855	0.220982	2.75987	1.76114	0.759504	0.505529		*	ns	ns	ns	ns	*	*	*	*	ns	ns	ns	ns	ns	ns
1780	Unknown	1.2274	0.255218	0.747706	0.103176	1.27773	0.267544	1.36263	0.189422	0.719976	0.0452933	0.694385	0.0806859		ns	ns	ns	ns	ns	ns	ns	ns	ns	ns	ns	ns	ns	ns	ns
1784	Unknown	1.55529	0.64761	0.524515	0.119495	1.09338	0.370435	1.62707	0.565045	0.737209	0.0729885	0.693715	0.00752809		ns	ns	ns	ns	ns	ns	ns	ns	ns	ns	ns	ns	ns	ns	ns
1790	1790_Sam3 [Nicotiana tabacum]	13.8178	7.32874	5.17183	1.58167	4.97068	5.28098	1.30909	0.111694	1.06116	0.392956	0.764491	0.496358		ns	ns	ns	*	*	ns	ns	ns	*	ns	ns	*	ns	ns	*
1799	1799_Sam3 [Nicotiana tabacum]	4.50945	1.31688	1.9398	0.422615	2.9204	2.91639	0.942119	0.306494	0.767628	0.489074	0.421251	0.23147		ns	ns	*	ns	*	ns	*	ns	*	*	ns	*	ns	*	*
1806	PREDICTED: psbP-like protein 1, chloroplastic [Nicotiana tabacum]	3.32677	0.737253	1.69552	0.466361	2.46928	2.91524	0.767388	0.279078	0.327153	0.147627	0.152337	0.0585384		ns	ns	*	*	*	ns	*	ns	*	*	ns	*	ns	ns	*
1811	1811_Sam3 [Nicotiana tabacum]	2.40224	0.212656	2.28554	0.353293	1.83622	1.70105	0.832742	0.553278	0.865845	0.536366	0.36592	0.251606		ns	ns	*	*	*	ns	*	*	*	*	*	*	ns	ns	ns
1812		4.06476	1.80115	2.41958	1.15124	2.36815	2.36278	0.756112	0.43416	0.375397	0.162563	0.237226	0.085176		ns	ns	*	*	*	ns	*	*	*	*	*	*	ns	*	*
1816	1816_Sam3 [Nicotiana tabacum]	4.12712	2.068	2.51799	0.819987	2.82496	2.93198	1.01426	0.472727	0.725401	0.370769	0.390881	0.183847		ns	ns	ns	ns	ns	ns	ns	ns	ns	ns	ns	ns	ns	ns	ns
1820	1820_Sam3 [Nicotiana tabacum]	5.81162	3.43686	2.93314	0.699982	3.32574	3.83759	1.05524	0.472807	0.784735	0.7992	0.292327	0.233093		ns	ns	*	*	*	ns	*	ns	*	ns	ns	*	ns	*	*
1824	Unknown	1.02617	0.340865	1.14636	0.352256	0.831552	0.13258	0.7867	0.374703	0.94343	0.195075	1.10586	0.171886		ns	ns	ns	ns	ns	ns	ns	ns	ns	ns	ns	ns	ns	ns	ns
1829	1829_Sam3 [Nicotiana tabacum]	2.57931	0.841902	1.81701	0.744036	1.89271	2.27968	0.864991	0.229532	0.46687	0.226885	0.333179	0.170592		ns	ns	ns	ns	*	ns	ns	ns	*	ns	ns	*	ns	ns	ns
1847	1847_Sam3 [Nicotiana tabacum]	2.41858	1.119	0.974707	0.150952	1.23052	0.609732	0.972917	0.355878	0.69186	0.104633	0.696032	0.273341		ns	ns	ns	ns	ns	ns	ns	ns	ns	ns	ns	ns	ns	ns	ns
1851	1851_NAD(P)H:plastoquinone dehydrogenase complex subunit O isoform 1 [Theobroma cacao]	1.21521	0.127201	1.17705	0.229946	1.53531	0.228994	1.05028	0.292976	0.954507	0.273153	1.09921	0.223585		ns	ns	ns	ns	ns	ns	ns	ns	ns	ns	ns	ns	ns	ns	ns
1908	1908_RecName: Full=Nucleoside diphosphate kinase; Short=NDK; Short=NDP kinase [Capsicum annuum]	0.635211	0.0779155	1.03858	0.377318	0.679703	0.175873	0.937802	0.576397	1.63632	0.272335	1.81122	0.995863		ns	ns	ns	ns	ns	ns	ns	ns	ns	ns	ns	ns	ns	ns	ns
1925	Unknown	0.786047	0.0900801	0.801384	0.239025	0.649241	0.369721	0.878378	0.174448	1.7724	0.746825	1.26327	0.870795		ns	ns	ns	ns	ns	ns	ns	ns	ns	ns	ns	ns	ns	ns	ns
1926	1926_PREDICTED: abscisic stress-ripening protein 2 [Nicotiana tomentosiformis]	0.462936	0.0944227	0.718792	0.11935	0.656802	0.304807	0.900773	0.279558	1.99026	0.497277	1.86346	1.62853		ns	*	*	*	*	*	*	*	*	ns	ns	ns	ns	ns	ns
1939	1939_PREDICTED: ribulose bisphosphate carboxylase small chain, chloroplastic [Nicotiana tomentosiformis]	0.826235	0.0983782	1.15451	0.297906	1.17703	0.455577	0.749568	0.279466	1.26193	0.758976	1.23944	1.03792		ns	ns	ns	ns	ns	ns	ns	ns	ns	ns	ns	ns	ns	ns	ns
1979	1979_PREDICTED: ribulose bisphosphate carboxylase small chain, chloroplastic [Nicotiana tomentosiformis]	1.06271	0.416578	0.925514	0.534561	3.04879	2.22294	0.975053	0.594635	0.483965	0.467825	1.19909	0.828905		ns	ns	ns	ns	ns	ns	ns	ns	ns	ns	ns	ns	ns	ns	ns
1987	1987_RecName: Full=Plastocyanin B'/B'' [Nicotiana tabacum]	1.91229	0.59216	0.897609	0.0223152	0.817831	0.312205	2.12177	0.636942	0.749604	0.158801	0.546282	0.153871		ns	ns	ns	ns	ns	ns	ns	ns	ns	ns	ns	ns	ns	ns	ns
1999	Unknown	1.57203	0.818781	0.705169	0.101084	0.511563	0.100438	1.1772	0.276121	0.655455	0.233482	0.518534	0.166048		ns	ns	ns	ns	ns	ns	ns	ns	ns	ns	ns	ns	ns	ns	ns
2008	Unknown	1.77775	0.140475	1.33135	0.138756	1.67544	0.24551	0.353411	0.0567773	0.763109	0.259678	0.774751	0.451949		ns	ns	ns	ns	ns	ns	ns	ns	ns	ns	ns	ns	ns	ns	ns
2009	Unknown	1.5565	0.529762	0.723859	0.125547	0.562395	0.106124	1.52658	0.508711	0.550153	0.145523	0.447958	0.059244		ns	ns	ns	ns	ns	ns	ns	ns	ns	ns	ns	ns	ns	ns	ns
2017	Unknown	1.29934	0.478538	0.539482	0.185063	0.495571	0.149633	1.06811	0.207335	0.566121	0.10307	0.542813	0.114981		ns	ns	ns	ns	ns	ns	ns	ns	ns	ns	ns	ns	ns	ns	ns
2021	Photosystem I iron-sulfur center	1.51842	0.510753	0.24322	0.0547004	0.49279	0.435881	1.00414	0.608842	0.189207	0.0976444	0.289874	0.13678		ns	*	ns	ns	*	*	ns	ns	*	ns	*	ns	ns	*	*
2025	2025_germin like protein [Nicotiana tabacum]	1.07254	0.0869587	0.68268	0.0856466	0.961699	0.304176	1.28991	0.332212	1.03286	0.241151	0.897369	0.184683		ns	ns	ns	ns	ns	ns	ns	ns	ns	ns	ns	ns	ns	ns	ns
2026	Unknown	1.05276	0.159616	0.727952	0.216603	1.04794	0.474963	1.35474	0.143477	1.10326	0.25153	0.946814	0.170075		ns	ns	ns	ns	ns	ns	ns	ns	ns	ns	ns	ns	ns	ns	ns
2027	Unknown	0.923846	0.318099	0.53883	0.0979121	1.04241	0.437749	1.00539	0.270393	0.988763	0.337328	0.902611	0.270861		ns	ns	ns	ns	ns	ns	ns	ns	ns	ns	ns	ns	ns	ns	ns
